# Supplementary material for: MHJ_0461 is a multifunctional leucine aminopeptidase on the surface of Mycoplasma hyopneumoniae
Source: PubMed Central journal article supplement (PMC4313372; doi:10.1098/rsob.140175), 2015-01-14
Supplement: rsob140175supp1.pdf [file rsob140175supp1.pdf]

*mhj\_0461* sequence highlighting inframe TGA codons that were changed to TGG during commercial gene synthesis.

1 ATT TTT ATC AAG TAT TCA AAT AAA TTT GAA TCC AAT CGA ATA ACC ATT  
49 GAA CCA GCT TAT TCT GAT TCG CAA ATT CCA ATG TTG ATA AAA GAA GAT  
97 TTA GCT ATT ACC GAG TAT CTT GGG CAA AAA AAG GCT TAT ATT AAT TTA  
145 GGC TCC CGC TCA AAA GAA TTA ACT CCG AAC CGT TTT CGC AAA ATT GCT  
193 GCA AAA TTA GGT CAT TAT CCC CGT GAT ATG CAA ATT AAT TTT GAT AAA  
241 TTT CCA AAT TCT TTC TTG AGA TAT TTA ATC GAA GTT ATT GCT TTT CAA  
289 AGA TCT GAT ATC TTC TCG CTA AGA GCC GAT TAT GCT AAA AAT CGA GCT  
337 AAA AAT CGT GAT ATT TTA GTG GTT TCA AGT TAT TTA GAT GAA CTA AAA  
385 CCG ATA ATT GAT AAA TAC CAA ATA ATT AAT AAC AGC GTC AAT TAT GCC  
433 CGT TAT TAC CAA AAT ATG CCC CCT AAT ATG GCA AGT TCT GAA TTT CTT  
481 GCA AGC GAG ATT CAG AAG AAA ATG AAC CTA AAT CCA AAA TTA ACG GTC  
529 AAG GTT TTA GGC GAA AAT GAA GTG CGA AAA TTA GGA ATG AAC CTG CTT  
577 TTA GCG GTC AAT AGA GGA TCA ACT TAT GAT GCT AAA TTA GTA GTG ATT  
625 TCT TAT GAA GGG CTT CCA GGA TCA CAA TAT AAA ACT GCT TTT ATT GGT  
673 AAA GGA ATT ACT TTT GAT TCA GGT GGT TAT AAT ATC AAA ACT GGC ATG  
721 TAT ATG AAT GAT ATG AAA ATT GAT ATG TCA GGA GCG ATA ATC TGT GCA  
769 GCT GCA ATT GAT GCC TTA TCA CAA TTT AAT CCC TTA GCA AAT GTT GTC  
817 GCT GTT TTA CCA CTT ACC GAT AAC CGT CTT AAT GGC GAT GCA AAT ACG  
865 CCC GAT GCA GTA TGA AGA TCA ATG AAT GGT AAA ACA GTT GAG ATT AAT  
913 AAT ACT GAC GCC GAG GGT CGG CTC ATT TTA GCA GAT GCA ATC ACT TAT  
961 GCG ATT AGA CAA GAA AAA GCA AGT GAA ATT ATT TCG ATT GCA ACT CTG  
1009 ACA GGA GCA ATT CGT ATT GCT TTA GGG GAA ACC TTT ACT GGA GCT TTT  
1057 GCA AAT GAG GAA AAA ATT TGA AAG AAC TTT AAC GAG GCA TCA AAA GAA

1105 GCC GGA GAA CTA ATT TGA AGA ATG CCT CTT CAT CAG GAT TTT GCC CAA  
1153 AAT ATC CGT GAT TCA AAA GTG GCG GAT TTA AAA AAT ACT GAT TTT TCC  
1201 GGC AAA GCC GGT TCT TCT TCT GCC GCA ATG TTT CTA GCT GAG TTT GTC  
1249 GAA GAT AAA CCG TTT ATT CAT TTG GAT ATT GCC GCG ACT GCT TTT GTC  
1297 AAA AAT ACC CCA ACT GGT GTT ATG GTT AGG TCT TTA GTT GAA TAT ATT  
1345 TTA GCA AAG CAA AAC TAA
