# Supplementary material for: MHJ_0461 is a multifunctional leucine aminopeptidase on the surface of Mycoplasma hyopneumoniae
Source: PubMed Central journal article supplement (PMC4313372; doi:10.1098/rsob.140175), 2015-01-14
Supplement: rsob140175supp2.pdf [file rsob140175supp2.pdf]

## Mass Spectrometry data on rMHJ\_0461 multimeric bands in denaturing gel

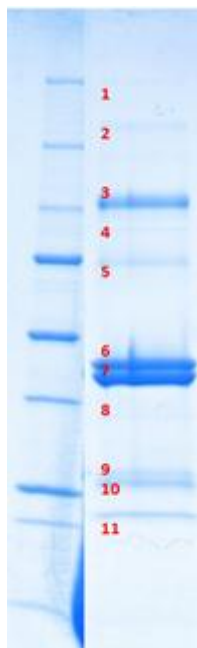

Figure above shows rMHJ\_0461 multimeric bands, which are numbered 1 to 11. Mass spec data for each band is provided below.

### Band 1 250kDa

[2::Q4A9M4](#) Mass: 51376 Score: 707 Matches: 10(5) Sequences: 10(5) emPAI: 0.64 tr|Q4A9M4|pepA Leucyl aminopeptidase Tax\_Id=262719 [Mycoplasma hyopneumoniae (strain J / ATCC 25934 / NCTC 10110)]

### Protein sequence coverage: 30%

|     |                   |                    |                    |                   |                    |
|-----|-------------------|--------------------|--------------------|-------------------|--------------------|
| 1   | MKNFSEIFIK        | YSNKFESNRI         | <b>TIEPAYSDSQ</b>  | <b>IPMLIKEDLA</b> | <b>ITEYLGQKKA</b>  |
| 51  | YINLGSRSKE        | LTPNRFKIA          | AKLGHYPRDM         | QINFDFPNS         | FLRYLIEVIA         |
| 101 | FQRSDIFSLR        | ADYAKNRAKN         | <b>RDILVVSSYL</b>  | <b>DELKPIIDKY</b> | <b>QIINNSVNYA</b>  |
| 151 | <b>RYYQNMPPNM</b> | ASSEFLASEI         | QKKMNLNPKL         | TVKVLGENEV        | RKLGMNLLLA         |
| 201 | VNRGSTYDAK        | LVISYEGLP          | GSQYKTAFIG         | KGITFDSGGY        | NIKTGMYMND         |
| 251 | MKIDMSGAIL        | CAAIDALSQ          | FNPLAN <b>VVAV</b> | <b>LPLTDNRLNG</b> | <b>DANTPDAVWR</b>  |
| 301 | SMNGKTVEIN        | NTDAEGR <b>LIL</b> | <b>ADAITYAIRQ</b>  | <b>EKASEIISIA</b> | <b>TLTGAIIRIAL</b> |
| 351 | <b>GETFTGAFAN</b> | <b>EKIWKNFNE</b>   | ASKEAGELIW         | <b>RMPLHQDFAQ</b> | <b>NIRDSKVADL</b>  |
| 401 | KNTDFSGKAG        | SSSAAMFLAE         | FVEDKPFHIL         | DIAATAFVKN        | TPTGVMVRSL         |
| 451 | VEYILAKQN         |                    |                    |                   |                    |

| Query               | Start | End | Observed  | Mr(expt)  | Mr(calc)  | ppm  | M Score | Expect | Rank    | U | Peptide                                        |
|---------------------|-------|-----|-----------|-----------|-----------|------|---------|--------|---------|---|------------------------------------------------|
| <a href="#">261</a> | 20    | 36  | 968.0234  | 1934.0323 | 1934.0070 | 13.1 | 0       | 76     | 0.028   | 1 | <b>U R.ITIEPAYSDSQIPMLIK.E + Oxidation (M)</b> |
| <a href="#">164</a> | 37    | 48  | 690.3646  | 1378.7146 | 1378.6980 | 12.0 | 0       | 77     | 0.015   | 1 | <b>U K.EDLAITEYLGQK.K</b>                      |
| <a href="#">276</a> | 122   | 139 | 1030.5959 | 2059.1772 | 2059.1452 | 15.5 | 0       | 91     | 0.00081 | 1 | <b>U R.DILVVSSYLDELKPIIDK.Y</b>                |
| <a href="#">186</a> | 140   | 151 | 727.8908  | 1453.7670 | 1453.7313 | 24.5 | 0       | 61     | 0.71    | 1 | <b>U K.YQIINNSVNYAR.Y</b>                      |
| <a href="#">123</a> | 277   | 287 | 598.8626  | 1195.7106 | 1195.6925 | 15.2 | 0       | 58     | 0.61    | 1 | <b>U N.VVAVLPLTDNR.L</b>                       |
| <a href="#">182</a> | 288   | 300 | 715.3578  | 1428.7010 | 1428.6633 | 26.4 | 0       | 52     | 5.4     | 1 | <b>U R.LNGDANTPDAVWR.S + Deamidated (NQ)</b>   |
| <a href="#">153</a> | 318   | 329 | 666.9082  | 1331.8018 | 1331.7812 | 15.5 | 0       | 84     | 0.0018  | 1 | <b>R.LILADAITYAIR.Q</b>                        |
| <a href="#">199</a> | 333   | 347 | 758.4526  | 1514.8906 | 1514.8668 | 15.7 | 0       | 106    | 1.5e-05 | 1 | <b>U K.ASEIISIATLTGAIR.I</b>                   |

[230](#) 348 - 363 849.4329 1696.8512 1696.8308 12.0 0 60 0.99 1 U R.IALGETFTGAFANEK.I  
[194](#) 382 - 393 743.3822 1484.7498 1484.7194 20.5 0 55 2.8 1 U R.MPLHQDFAQNIR.D + Oxidation (M)

## Band 2 175kDa

[2::Q4A9M4](#) Mass: 51376 Score: 1423 Matches: 25(9) Sequences: 21(9) emPAI: 1.53 tr|Q4A9M4|pepA Leucyl aminopeptidase Tax\_Id=262719 [Mycoplasma hyopneumoniae (strain J / ATCC 25934 / NCTC 10110)]

### Protein sequence coverage: 52%

|     |            |            |            |            |             |
|-----|------------|------------|------------|------------|-------------|
| 1   | MKNFSEIFIK | YSNKFESNRI | TIEPAYSDSQ | IPMLIKEDLA | ITEYLGQKKA  |
| 51  | YINLGSRSKE | LTPNRFKIA  | AKLGHYPRDM | QINFDKFPNS | FLRYLIEVIA  |
| 101 | FQRSDIFSLR | ADYAKNRAKN | RDILVVSSYL | DELKPIIDKY | QIINNSVNYA  |
| 151 | RYYQNMPPNM | ASSEFLASEI | QKKMNLNPKL | TVKVLGENEV | RKLGMNLLLA  |
| 201 | VNRGSTYDAK | LVVISYEGLP | GSQYKTAFIG | KGITFDSGGY | NIKTGMYMND  |
| 251 | MKIDMSGAIL | CAAIDALSQ  | FNPLANVVAV | LPLTDNRLNG | DANTPDAVWR  |
| 301 | SMNGKTVEIN | NTDAEGRLLI | ADAITYAIRQ | EKASEISIA  | TLTGAIIRAL  |
| 351 | GETFTGAFAN | EKIWKNFNE  | ASKEAGELIW | RMPLHQDFAQ | NIRDSKVADL  |
| 401 | KNTDFSGKAG | SSAAMFLAE  | FVEDKPFHIL | DIAATAFVKN | TPTGVMVRSLS |
| 451 | VEYILAKQN  |            |            |            |             |

| Query               | Start | End | Observed  | Mr(expt)  | Mr(calc)  | ppm  | M Score | Expect  | Rank | U | Peptide                                     |
|---------------------|-------|-----|-----------|-----------|-----------|------|---------|---------|------|---|---------------------------------------------|
| <a href="#">86</a>  | 3     | 10  | 499.2757  | 996.5369  | 996.5280  | 8.89 | 0 46    | 13      | 4    | U | K.NFSEIFIK.Y                                |
| <a href="#">279</a> | 20    | 36  | 960.0221  | 1918.0296 | 1918.0121 | 9.14 | 0 61    | 0.85    | 1    | U | R.ITIEPAYSDSQIPMLIK.E                       |
| <a href="#">284</a> | 20    | 36  | 968.0264  | 1934.0382 | 1934.0070 | 16.1 | 0 52    | 6.2     | 1    | U | R.ITIEPAYSDSQIPMLIK.E + Oxidation (M)       |
| <a href="#">173</a> | 37    | 48  | 690.3646  | 1378.7146 | 1378.6980 | 12.0 | 0 82    | 0.0057  | 1    | U | K.EDLAITEYLGQK.K                            |
| <a href="#">178</a> | 79    | 89  | 692.8195  | 1383.6244 | 1383.6129 | 8.30 | 1 61    | 0.51    | 1    | U | R.DMQINFDKFPN.S + Oxidation (M)             |
| <a href="#">277</a> | 79    | 93  | 944.4739  | 1886.9333 | 1886.8985 | 18.5 | 1 83    | 0.0054  | 1    | U | R.DMQINFDKFPNSFLR.Y + Oxidation (M)         |
| <a href="#">59</a>  | 87    | 93  | 440.7499  | 879.4852  | 879.4603  | 28.3 | 0 44    | 22      | 2    | U | K.FPNSFLR.Y                                 |
| <a href="#">142</a> | 94    | 103 | 626.3664  | 1250.7182 | 1250.7023 | 12.7 | 0 69    | 0.066   | 1    | U | R.YLIEVIAFQR.S                              |
| <a href="#">298</a> | 122   | 139 | 1030.5959 | 2059.1772 | 2059.1452 | 15.5 | 0 91    | 0.00071 | 1    | U | R.DILVVSSYLDELKPIIDK.Y                      |
| <a href="#">198</a> | 140   | 151 | 727.8831  | 1453.7516 | 1453.7313 | 14.0 | 0 68    | 0.15    | 1    | U | K.YQIINNSVNYAR.Y                            |
| <a href="#">199</a> | 140   | 151 | 728.3762  | 1454.7378 | 1454.7153 | 15.4 | 0 65    | 0.29    | 1    | U | K.YQIINNSVNYAR.Y + Deamidated (NQ)          |
| <a href="#">200</a> | 140   | 151 | 728.3787  | 1454.7429 | 1454.7153 | 18.9 | 0 61    | 0.68    | 1    | U | K.YQIINNSVNYAR.Y + Deamidated (NQ)          |
| <a href="#">325</a> | 152   | 172 | 1240.5819 | 2479.1492 | 2479.1035 | 18.4 | 0 81    | 0.0095  | 1    | U | R.YYQNMPPNMASSEFLASEIQK.K + 2 Oxidation (M) |
| <a href="#">170</a> | 192   | 203 | 679.4134  | 1356.8122 | 1356.7911 | 15.5 | 1 88    | 0.00084 | 1    | U | R.KLGMNLLLAVNR.G + Oxidation (M)            |
| <a href="#">134</a> | 193   | 203 | 615.3640  | 1228.7135 | 1228.6962 | 14.1 | 0 96    | 0.00015 | 1    | U | K.LGMNLLLAVNR.G + Oxidation (M)             |
| <a href="#">242</a> | 211   | 225 | 826.9601  | 1651.9057 | 1651.8821 | 14.3 | 0 52    | 5.4     | 1    | U | K.LVVISYEGLPGSQYK.T                         |
| <a href="#">148</a> | 232   | 243 | 636.3242  | 1270.6337 | 1270.6194 | 11.3 | 0 62    | 0.58    | 1    |   | K.GITFDSGGYNIK.T                            |
| <a href="#">127</a> | 277   | 287 | 598.8672  | 1195.7199 | 1195.6925 | 22.9 | 0 51    | 2.5     | 1    | U | N.VVAVLPLTDNR.L                             |
| <a href="#">192</a> | 288   | 300 | 715.3426  | 1428.6706 | 1428.6633 | 5.09 | 0 71    | 0.062   | 1    | U | R.LNGDANTPDAVWR.S + Deamidated (NQ)         |
| <a href="#">164</a> | 318   | 329 | 666.9033  | 1331.7921 | 1331.7812 | 8.11 | 0 89    | 0.00067 | 1    |   | R.LILADAITYAIR.Q                            |
| <a href="#">211</a> | 333   | 347 | 758.4500  | 1514.8854 | 1514.8668 | 12.3 | 0 89    | 0.00079 | 1    | U | K.ASEIISIATLTGAIR.I                         |
| <a href="#">246</a> | 348   | 363 | 849.4274  | 1696.8402 | 1696.8308 | 5.54 | 0 73    | 0.049   | 1    | U | R.IALGETFTGAFANEK.I                         |
| <a href="#">202</a> | 382   | 393 | 735.3812  | 1468.7478 | 1468.7245 | 15.8 | 0 49    | 11      | 1    | U | R.MPLHQDFAQNIR.D                            |
| <a href="#">207</a> | 382   | 393 | 743.3796  | 1484.7447 | 1484.7194 | 17.0 | 0 48    | 14      | 1    | U | R.MPLHQDFAQNIR.D + Oxidation (M)            |
| <a href="#">93</a>  | 449   | 457 | 518.3173  | 1034.6201 | 1034.6012 | 18.3 | 0 43    | 20      | 1    | U | R.SLVEYILAK.Q                               |

## Band 3 125kDa

1. [2::Q4A9M4](#) Mass: 51376 Score: 2372 Matches: 63(30) Sequences: 35(15) emPAI: 3.99 tr|Q4A9M4|pepA Leucyl aminopeptidase Tax\_Id=262719 [Mycoplasma hyopneumoniae (strain J / ATCC 25934 / NCTC 10110)]

Protein sequence coverage: 66%

|     |                    |                    |            |            |            |
|-----|--------------------|--------------------|------------|------------|------------|
| 1   | MK <b>NFSEIFIK</b> | YSNKFESNRI         | TIEPAYSDSQ | IPMLIKEDLA | ITEYLGQKKA |
| 51  | YINLGSRSKE         | LTPNRFKIA          | AKLGHYPRDM | QINFDKFPNS | FLRYLIEVIA |
| 101 | FQRSDIFSLR         | ADYAKNRAKN         | RDILVVSSYL | DELKPIIDKY | QIINNSVNYA |
| 151 | RYYQNMPPNM         | ASSEFLASEI         | QKKMNLNPKL | TVKVLGENEV | RKLGMNLLLA |
| 201 | VNRGSTYDAK         | LVVISYEGLP         | GSQYKTAFIG | KGITFDSGGY | NIKTGMYMND |
| 251 | MKIDMSGAIL         | CAA <b>AIDALSQ</b> | FNPLANVVAV | LPLTDNRLNG | DANTPDAVWR |
| 301 | SMNGKTVEIN         | NTDAEGRLL          | ADAITYAIRQ | EKASEISIA  | TLTGAIIRAL |
| 351 | GETFTGAFAN         | EKIWKNFNE          | ASKEAGELIW | RMPLHQDFAQ | NIRDSKVADL |
| 401 | KNTDFSGKAG         | SSSAAMFLAE         | FVEDKPFHIL | DIAATAFVKN | TPTGVMVRSL |
| 451 | VEYLAKQN           |                    |            |            |            |

| Query               | Start | End | Observed  | Mr(expt)  | Mr(calc)  | ppm   | M Score | Expect | Rank    | U | Peptide                                                |
|---------------------|-------|-----|-----------|-----------|-----------|-------|---------|--------|---------|---|--------------------------------------------------------|
| <a href="#">70</a>  | 3     | 10  | 499.2778  | 996.5411  | 996.5280  | 13.1  | 0       | 36     | 1.3e+02 | 1 | U K.NFSEIFIK.Y                                         |
| <a href="#">71</a>  | 3     | 10  | 499.7687  | 997.5229  | 997.5120  | 10.9  | 0       | 62     | 0.35    | 2 | U K.NFSEIFIK.Y + Deamidated (NQ)                       |
| <a href="#">240</a> | 20    | 33  | 790.8911  | 1579.7676 | 1579.7440 | 15.0  | 0       | 41     | 66      | 1 | U R.ITIEPAYSDSQIPM.L + Oxidation (M)                   |
| <a href="#">300</a> | 20    | 36  | 968.0205  | 1934.0264 | 1934.0070 | 10.0  | 0       | 32     | 6.3e+02 | 1 | U R.ITIEPAYSDSQIPMLIK.E + Oxidation (M)                |
| <a href="#">270</a> | 34    | 48  | 867.4964  | 1732.9782 | 1732.9611 | 9.91  | 1       | 78     | 0.014   | 1 | U M.LIKEDLAITEYLGQK.K                                  |
| <a href="#">148</a> | 37    | 48  | 690.3596  | 1378.7046 | 1378.6980 | 4.82  | 0       | 71     | 0.075   | 1 | U K.EDLAITEYLGQK.K                                     |
| <a href="#">149</a> | 79    | 89  | 692.8220  | 1383.6294 | 1383.6129 | 11.9  | 1       | 57     | 1.4     | 1 | U R.DMQINFDKFPN.S + Oxidation (M)                      |
| <a href="#">249</a> | 79    | 91  | 809.8728  | 1617.7311 | 1617.7133 | 10.9  | 1       | 58     | 1.3     | 1 | U R.DMQINFDKFPNSF.L + Oxidation (M)                    |
| <a href="#">294</a> | 79    | 93  | 944.9657  | 1887.9169 | 1887.8825 | 18.2  | 1       | 60     | 1       | 1 | U R.DMQINFDKFPNSFLR.Y + Deamidated (NQ); Oxidation (M) |
| <a href="#">116</a> | 94    | 103 | 626.3664  | 1250.7182 | 1250.7023 | 12.7  | 0       | 69     | 0.073   | 1 | U R.YLIEVIAFQR.S                                       |
| <a href="#">69</a>  | 103   | 110 | 497.3145  | 992.6145  | 992.5403  | 74.7  | 1       | 35     | 76      | 2 | U Q.RSDIFSLR.A                                         |
| <a href="#">28</a>  | 104   | 110 | 419.2311  | 836.4476  | 836.4392  | 10.0  | 0       | 49     | 6.7     | 1 | U R.SDIFSLR.A                                          |
| <a href="#">314</a> | 122   | 139 | 1030.5777 | 2059.1408 | 2059.1452 | -2.17 | 0       | 83     | 0.0057  | 1 | U R.DILVVSSYLDELKPIIDK.Y                               |
| <a href="#">315</a> | 122   | 139 | 1030.5898 | 2059.1651 | 2059.1452 | 9.64  | 0       | 94     | 0.00035 | 1 | U R.DILVVSSYLDELKPIIDK.Y                               |
| <a href="#">316</a> | 122   | 139 | 1030.5929 | 2059.1712 | 2059.1452 | 12.6  | 0       | 82     | 0.0053  | 1 | U R.DILVVSSYLDELKPIIDK.Y                               |
| <a href="#">317</a> | 122   | 139 | 1030.5929 | 2059.1712 | 2059.1452 | 12.6  | 0       | 65     | 0.32    | 1 | U R.DILVVSSYLDELKPIIDK.Y                               |
| <a href="#">178</a> | 140   | 151 | 728.3710  | 1454.7275 | 1454.7153 | 8.38  | 0       | 63     | 0.42    | 1 | U K.YQIINNSVNYAR.Y + Deamidated (NQ)                   |
| <a href="#">179</a> | 140   | 151 | 728.3736  | 1454.7326 | 1454.7153 | 11.9  | 0       | 56     | 2.3     | 1 | U K.YQIINNSVNYAR.Y + Deamidated (NQ)                   |
| <a href="#">348</a> | 152   | 172 | 1240.5719 | 2479.1292 | 2479.1035 | 10.4  | 0       | 42     | 78      | 1 | U R.YYQNMPPNMASSEFLASEIQK.K + 2 Oxidation (M)          |
| <a href="#">297</a> | 156   | 172 | 956.4584  | 1910.9022 | 1910.8754 | 14.0  | 0       | 85     | 0.0033  | 1 | U N.MPPNMASSEFLASEIQK.K + 2 Oxidation (M)              |
| <a href="#">143</a> | 192   | 203 | 679.4084  | 1356.8023 | 1356.7911 | 8.27  | 1       | 88     | 0.00098 | 1 | U R.KLGMNLLAVNR.G + Oxidation (M)                      |
| <a href="#">112</a> | 193   | 203 | 615.3593  | 1228.7041 | 1228.6962 | 6.50  | 0       | 83     | 0.0033  | 1 | U K.LGMNLLAVNR.G + Oxidation (M)                       |
| <a href="#">253</a> | 211   | 225 | 826.9574  | 1651.9003 | 1651.8821 | 11.0  | 0       | 62     | 0.52    | 1 | U K.LVVISYEGLPGSQYK.T                                  |
| <a href="#">121</a> | 232   | 243 | 636.3242  | 1270.6337 | 1270.6194 | 11.3  | 0       | 65     | 0.26    | 1 | K.GITFDSGGYNIK.T                                       |
| <a href="#">355</a> | 264   | 287 | 1276.2211 | 2550.4277 | 2550.3806 | 18.5  | 0       | 70     | 0.12    | 1 | U A.AIDALSQFNPLANVVAVLPLTDNR.L                         |
| <a href="#">356</a> | 264   | 287 | 1276.2211 | 2550.4277 | 2550.3806 | 18.5  | 0       | 95     | 0.00037 | 1 | U A.AIDALSQFNPLANVVAVLPLTDNR.L                         |
| <a href="#">242</a> | 273   | 287 | 796.4628  | 1590.9111 | 1590.9093 | 1.11  | 0       | 88     | 0.0011  | 1 | U N.PLANVVAVLPLTDNR.L                                  |
| <a href="#">104</a> | 277   | 287 | 598.8580  | 1195.7014 | 1195.6925 | 7.43  | 0       | 73     | 0.02    | 1 | U N.VVAVLPLTDNR.L                                      |
| <a href="#">164</a> | 288   | 300 | 714.8641  | 1427.7136 | 1427.6793 | 24.0  | 0       | 53     | 4.2     | 1 | U R.LNGDANTPDAVWR.S                                    |
| <a href="#">165</a> | 288   | 300 | 715.3426  | 1428.6706 | 1428.6633 | 5.09  | 0       | 86     | 0.0021  | 1 | U R.LNGDANTPDAVWR.S + Deamidated (NQ)                  |

| Query               | Start | End | Observed  | Mr(expt)  | Mr(calc)  | ppm   | M Score | Expect | Rank    | U | Peptide                                             |
|---------------------|-------|-----|-----------|-----------|-----------|-------|---------|--------|---------|---|-----------------------------------------------------|
| <a href="#">166</a> | 288   | 300 | 715.3502  | 1428.6858 | 1428.6633 | 15.7  | 0       | 55     | 2.7     | 1 | U R.LNGDANTPDAVWR.S + Deamidated (NQ)               |
| <a href="#">167</a> | 288   | 300 | 715.3527  | 1428.6909 | 1428.6633 | 19.3  | 0       | 101    | 7.8e-05 | 1 | U R.LNGDANTPDAVWR.S + Deamidated (NQ)               |
| <a href="#">136</a> | 318   | 329 | 666.9033  | 1331.7921 | 1331.7812 | 8.11  | 0       | 50     | 5.5     | 1 | R.LILADAITYAIR.Q                                    |
| <a href="#">137</a> | 318   | 329 | 666.9033  | 1331.7921 | 1331.7812 | 8.11  | 0       | 70     | 0.054   | 1 | R.LILADAITYAIR.Q                                    |
| <a href="#">138</a> | 318   | 329 | 666.9057  | 1331.7969 | 1331.7812 | 11.8  | 0       | 83     | 0.0029  | 1 | R.LILADAITYAIR.Q                                    |
| <a href="#">139</a> | 318   | 329 | 666.9082  | 1331.8018 | 1331.7812 | 15.5  | 0       | 91     | 0.0004  | 1 | R.LILADAITYAIR.Q                                    |
| <a href="#">267</a> | 318   | 332 | 859.9922  | 1717.9698 | 1717.9614 | 4.91  | 1       | 35     | 2.5e+02 | 3 | U R.LILADAITYAIRQEK.A + Deamidated (NQ)             |
| <a href="#">296</a> | 330   | 347 | 951.5399  | 1901.0652 | 1901.0469 | 9.64  | 1       | 72     | 0.055   | 1 | U R.QEKASEIISIATLTGAIR.I + Deamidated (NQ)          |
| <a href="#">207</a> | 333   | 347 | 758.4447  | 1514.8749 | 1514.8668 | 5.39  | 0       | 85     | 0.0025  | 1 | U K.ASEIISIATLTGAIR.I                               |
| <a href="#">208</a> | 333   | 347 | 758.4447  | 1514.8749 | 1514.8668 | 5.39  | 0       | 130    | 8e-08   | 1 | U K.ASEIISIATLTGAIR.I                               |
| <a href="#">209</a> | 333   | 347 | 758.4474  | 1514.8802 | 1514.8668 | 8.84  | 0       | 110    | 6.4e-06 | 1 | U K.ASEIISIATLTGAIR.I                               |
| <a href="#">210</a> | 333   | 347 | 758.4474  | 1514.8802 | 1514.8668 | 8.84  | 0       | 92     | 0.00045 | 1 | U K.ASEIISIATLTGAIR.I                               |
| <a href="#">211</a> | 333   | 347 | 758.4500  | 1514.8854 | 1514.8668 | 12.3  | 0       | 72     | 0.041   | 1 | U K.ASEIISIATLTGAIR.I                               |
| <a href="#">212</a> | 333   | 347 | 758.4500  | 1514.8854 | 1514.8668 | 12.3  | 0       | 66     | 0.18    | 1 | U K.ASEIISIATLTGAIR.I                               |
| <a href="#">213</a> | 333   | 347 | 758.4526  | 1514.8906 | 1514.8668 | 15.7  | 0       | 92     | 0.00039 | 1 | U K.ASEIISIATLTGAIR.I                               |
| <a href="#">214</a> | 333   | 347 | 758.4526  | 1514.8906 | 1514.8668 | 15.7  | 0       | 113    | 3.1e-06 | 1 | U K.ASEIISIATLTGAIR.I                               |
| <a href="#">215</a> | 333   | 347 | 758.4552  | 1514.8958 | 1514.8668 | 19.2  | 0       | 93     | 0.0003  | 1 | U K.ASEIISIATLTGAIR.I                               |
| <a href="#">216</a> | 333   | 347 | 758.4578  | 1514.9010 | 1514.8668 | 22.6  | 0       | 85     | 0.0019  | 1 | U K.ASEIISIATLTGAIR.I                               |
| <a href="#">257</a> | 348   | 363 | 849.3887  | 1696.7629 | 1696.8308 | -40.0 | 0       | 62     | 0.57    | 1 | U R.IALGETFTGAFANEEK.I                              |
| <a href="#">258</a> | 348   | 363 | 849.4191  | 1696.8236 | 1696.8308 | -4.22 | 0       | 80     | 0.0094  | 1 | U R.IALGETFTGAFANEEK.I                              |
| <a href="#">259</a> | 348   | 363 | 849.4274  | 1696.8402 | 1696.8308 | 5.54  | 0       | 64     | 0.37    | 1 | U R.IALGETFTGAFANEEK.I                              |
| <a href="#">260</a> | 348   | 363 | 849.4274  | 1696.8402 | 1696.8308 | 5.54  | 0       | 78     | 0.014   | 1 | U R.IALGETFTGAFANEEK.I                              |
| <a href="#">261</a> | 348   | 363 | 849.4356  | 1696.8567 | 1696.8308 | 15.3  | 0       | 48     | 17      | 1 | U R.IALGETFTGAFANEEK.I                              |
| <a href="#">262</a> | 348   | 363 | 849.4384  | 1696.8623 | 1696.8308 | 18.5  | 0       | 83     | 0.0046  | 1 | U R.IALGETFTGAFANEEK.I                              |
| <a href="#">61</a>  | 374   | 381 | 487.2716  | 972.5287  | 972.5029  | 26.6  | 0       | 55     | 2.6     | 1 | K.EAGELIWR.M                                        |
| <a href="#">190</a> | 382   | 393 | 743.3744  | 1484.7343 | 1484.7194 | 10.0  | 0       | 46     | 22      | 1 | U R.MPLHQDFAQNIR.D + Oxidation (M)                  |
| <a href="#">192</a> | 382   | 393 | 743.8701  | 1485.7257 | 1485.7034 | 15.0  | 0       | 54     | 4.1     | 1 | U R.MPLHQDFAQNIR.D + Deamidated (NQ); Oxidation (M) |
| <a href="#">194</a> | 382   | 393 | 743.8805  | 1485.7464 | 1485.7034 | 28.9  | 0       | 25     | 3.1e+03 | 8 | U R.MPLHQDFAQNIR.D + Deamidated (NQ); Oxidation (M) |
| <a href="#">246</a> | 382   | 394 | 800.8882  | 1599.7619 | 1599.7464 | 9.71  | 1       | 54     | 3.7     | 1 | U R.MPLHQDFAQNIRD.S + Oxidation (M)                 |
| <a href="#">277</a> | 409   | 425 | 888.4287  | 1774.8429 | 1774.8084 | 19.5  | 0       | 121    | 7.6e-07 | 1 | U K.AGSSSAAMFLAEFVEDK.P + Oxidation (M)             |
| <a href="#">311</a> | 409   | 427 | 1010.4895 | 2018.9645 | 2018.9295 | 17.3  | 0       | 83     | 0.0055  | 1 | U K.AGSSSAAMFLAEFVEDKPF.I + Oxidation (M)           |
| <a href="#">347</a> | 418   | 439 | 1237.6691 | 2473.3237 | 2473.3257 | -0.79 | 0       | 51     | 11      | 1 | U F.LAEFVEDKPFHLDIAATAFVK.N                         |
| <a href="#">78</a>  | 449   | 457 | 518.3130  | 1034.6115 | 1034.6012 | 10.0  | 0       | 43     | 22      | 1 | U R.SLVEYILAK.Q                                     |

## Band 4 87kDa

[2:::Q4A9M4](#) Mass: 51376 Score: 1473 Matches: 25(9) Sequences: 21(8) emPAI: 1.23 tr|Q4A9M4|pepA Leucyl aminopeptidase Tax\_Id=262719 [Mycoplasma hyopneumoniae (strain J / ATCC 25934 / NCTC 10110)]

## Protein sequence coverage: 53%

|     |            |            |            |            |            |
|-----|------------|------------|------------|------------|------------|
| 1   | MKNFSEIFIK | YSNKFESNRI | TIEPAYSDSQ | IPMLIKEDLA | ITEYLGQKKA |
| 51  | YINLGSRSKE | LTPNRFKRIA | AKLGHYPRDM | QINFDFPNS  | FLRYLIEVIA |
| 101 | FQRSDFSLR  | ADYAKNRAKN | RDILVVSSYL | DELKPIIDKY | QIINNSVNYA |
| 151 | RYYQNMPPNM | ASSEFLASEI | QKMMNLNPKL | TVKVLGENEV | RKLGMNLLLA |
| 201 | VNRGSTYDAK | LVVISYEGLP | GSQYKTAFIG | KGITFDSGGY | NIKTGMYMND |
| 251 | MKIDMSGAIL | CAAIDALSQ  | FNPLANVVAV | LPLTDNRLNG | DANTPDAVWR |
| 301 | SMNGKTVEIN | NTDAEGRLLI | ADAITYAIRQ | EKASEIISIA | TLTGAIIRAL |

351 **GETFTGAFAN** EEKIWKNFNE ASKEAGELIW **RMPLHQDFAQ** NIRDSKVADL  
 401 KNTDFSGKAG SSSAAMFLAE FVEDKPFHIL DIAATAFVKN TPTGVMVRSL  
 451 **VEYILAKQN**

| Query               | Start | End | Observed  | Mr(expt)  | Mr(calc)  | ppm  | M | Score | Expect  | Rank | U | Peptide                                     |
|---------------------|-------|-----|-----------|-----------|-----------|------|---|-------|---------|------|---|---------------------------------------------|
| <a href="#">90</a>  | 3     | 10  | 499.2757  | 996.5369  | 996.5280  | 8.89 | 0 | 46    | 13      | 1    | U | K.NFSEIFIK.Y                                |
| <a href="#">293</a> | 20    | 36  | 968.0205  | 1934.0264 | 1934.0070 | 10.0 | 0 | 53    | 6.1     | 1    | U | R.ITIEPAYSDSQIPMLIK.E + Oxidation (M)       |
| <a href="#">185</a> | 37    | 48  | 690.3646  | 1378.7146 | 1378.6980 | 12.0 | 0 | 48    | 14      | 3    | U | K.EDLAITEYLGQK.K                            |
| <a href="#">189</a> | 79    | 89  | 692.8269  | 1383.6393 | 1383.6129 | 19.1 | 1 | 63    | 0.38    | 1    | U | R.DMQINFDKFPN.S + Oxidation (M)             |
| <a href="#">60</a>  | 87    | 93  | 440.7479  | 879.4812  | 879.4603  | 23.8 | 0 | 39    | 63      | 6    | U | K.FPNSFLR.Y                                 |
| <a href="#">148</a> | 94    | 103 | 626.3688  | 1250.7230 | 1250.7023 | 16.5 | 0 | 51    | 4.3     | 1    | U | R.YLIEVIAFQR.S                              |
| <a href="#">37</a>  | 104   | 110 | 419.2311  | 836.4476  | 836.4392  | 10.0 | 0 | 56    | 1.4     | 1    | U | R.SDIFSLR.A                                 |
| <a href="#">301</a> | 122   | 139 | 1030.5959 | 2059.1772 | 2059.1452 | 15.5 | 0 | 91    | 0.00069 | 1    | U | R.DILVVSSYLDELKPIIDK.Y                      |
| <a href="#">211</a> | 140   | 151 | 727.8805  | 1453.7465 | 1453.7313 | 10.5 | 0 | 77    | 0.018   | 1    | U | K.YQIINNSVNYAR.Y                            |
| <a href="#">212</a> | 140   | 151 | 728.3685  | 1454.7224 | 1454.7153 | 4.87 | 0 | 45    | 31      | 2    | U | K.YQIINNSVNYAR.Y + Deamidated (NQ)          |
| <a href="#">334</a> | 152   | 172 | 1240.5719 | 2479.1292 | 2479.1035 | 10.4 | 0 | 69    | 0.15    | 1    | U | R.YYQNMPPNMASSEFLASEIQK.K + 2 Oxidation (M) |
| <a href="#">180</a> | 192   | 203 | 679.4084  | 1356.8023 | 1356.7911 | 8.27 | 1 | 112   | 3.4e-06 | 1    | U | R.KLGMNLLAVNR.G + Oxidation (M)             |
| <a href="#">143</a> | 193   | 203 | 607.3676  | 1212.7206 | 1212.7012 | 16.0 | 0 | 95    | 0.00016 | 1    | U | K.LGMNLLAVNR.G                              |
| <a href="#">144</a> | 193   | 203 | 615.3640  | 1228.7135 | 1228.6962 | 14.1 | 0 | 91    | 0.00053 | 1    | U | K.LGMNLLAVNR.G + Oxidation (M)              |
| <a href="#">258</a> | 211   | 225 | 826.9574  | 1651.9003 | 1651.8821 | 11.0 | 0 | 65    | 0.31    | 1    | U | K.LVVISYEGLPQSQYK.T                         |
| <a href="#">155</a> | 232   | 243 | 636.3242  | 1270.6337 | 1270.6194 | 11.3 | 0 | 65    | 0.26    | 1    | U | K.GITFDSGGYNIK.T                            |
| <a href="#">139</a> | 277   | 287 | 598.8603  | 1195.7060 | 1195.6925 | 11.3 | 0 | 54    | 1.5     | 1    | U | N.VVAVLPLTDNR.L                             |
| <a href="#">203</a> | 288   | 300 | 714.8565  | 1427.6984 | 1427.6793 | 13.4 | 0 | 28    | 1.3e+03 | 6    | U | R.LNGDANTPDAVWR.S                           |
| <a href="#">204</a> | 288   | 300 | 715.3477  | 1428.6807 | 1428.6633 | 12.2 | 0 | 113   | 4.8e-06 | 1    | U | R.LNGDANTPDAVWR.S + Deamidated (NQ)         |
| <a href="#">173</a> | 318   | 329 | 666.9082  | 1331.8018 | 1331.7812 | 15.5 | 0 | 103   | 2.4e-05 | 1    | U | R.LILADAITYAIR.Q                            |
| <a href="#">225</a> | 333   | 347 | 758.4474  | 1514.8802 | 1514.8668 | 8.84 | 0 | 119   | 8.6e-07 | 1    | U | K.ASEIISIATLTGAIR.I                         |
| <a href="#">261</a> | 348   | 363 | 849.4356  | 1696.8567 | 1696.8308 | 15.3 | 0 | 90    | 0.001   | 1    | U | R.IALGETFTGAFANEEK.I                        |
| <a href="#">215</a> | 382   | 393 | 735.3837  | 1468.7529 | 1468.7245 | 19.3 | 0 | 48    | 15      | 1    | U | R.MPLHQDFAQNIR.D                            |
| <a href="#">220</a> | 382   | 393 | 743.3796  | 1484.7447 | 1484.7194 | 17.0 | 0 | 49    | 13      | 1    | U | R.MPLHQDFAQNIR.D + Oxidation (M)            |
| <a href="#">98</a>  | 449   | 457 | 518.3130  | 1034.6115 | 1034.6012 | 10.0 | 0 | 44    | 15      | 1    | U | R.SLVEYILAK.Q                               |

## Band 5 75kDa

[2::Q4A9M4](#) Mass: 51376 Score: 1644 Matches: 37(13) Sequences: 25(10) emPAI: 2.45 tr|Q4A9M4|pepA Leucyl aminopeptidase Tax\_Id=262719 [Mycoplasma hyopneumoniae (strain J / ATCC 25934 / NCTC 10110)]

## Protein sequence coverage: 57%

1 MKNFSEIFIK YSNKFESNRI TIEPAYSDSQ IPMLIKEDLA ITEYLGQKKA  
 51 YINLGSRSKE LTPNRFKIA AKLGHYPRDM QINFDFKFPNS FLRYLIEVIA  
 101 FQRSDIFSLR ADYAKNRAKN RDILVVSSYL DELKPIIDKY QIINNSVNYA  
 151 RYYQNMPPNM ASSEFLASEI QKMMNLNPKL TVKVLGENEV RKLGMNLLLA  
 201 VNRGSTYDAK LVVISYEGLP GSQYKTAFIG KGITFDSGGY NIKTGMVMYND  
 251 MKIDMSGAIL CAAIDALSQ FNPLANVVAV LPLTDNRLNG DANTPDAVWR  
 301 SMNGKTVGIN NTDAEGRIL ADAITYAIRQ EKASEISIA TLTGAIKIAL  
 351 **GETFTGAFAN** **EEKIWKNFNE** **ASKEAGELIW** **RMPLHQDFAQ** **NIRDSKVADL**  
 401 KNTDFSGKAG SSSAAMFLAE FVEDKPFHIL DIAATAFVKN TPTGVMVRSL  
 451 **VEYILAKQN**

| Query               | Start | End | Observed  | Mr(expt)  | Mr(calc)  | ppm  | M | Score | Expect  | Rank | U | Peptide                                           |
|---------------------|-------|-----|-----------|-----------|-----------|------|---|-------|---------|------|---|---------------------------------------------------|
| <a href="#">100</a> | 3     | 10  | 499.2778  | 996.5411  | 996.5280  | 13.1 | 0 | 41    | 38      | 1    | U | K.NFSEIFIK.Y                                      |
| <a href="#">304</a> | 20    | 36  | 960.0309  | 1918.0472 | 1918.0121 | 18.3 | 0 | 65    | 0.33    | 1    | U | R.ITIEPAYSDSQIPMLIK.E                             |
| <a href="#">307</a> | 20    | 36  | 968.0264  | 1934.0382 | 1934.0070 | 16.1 | 0 | 48    | 16      | 1    | U | R.ITIEPAYSDSQIPMLIK.E + Oxidation (M)             |
| <a href="#">183</a> | 37    | 48  | 690.3646  | 1378.7146 | 1378.6980 | 12.0 | 0 | 75    | 0.024   | 1    | U | K.EDLAITEYLGQK.K                                  |
| <a href="#">78</a>  | 50    | 57  | 447.2532  | 892.4919  | 892.4766  | 17.1 | 0 | 36    | 1.4e+02 | 1    | U | K.AYINLGS.RS                                      |
| <a href="#">186</a> | 79    | 89  | 692.8319  | 1383.6493 | 1383.6129 | 26.3 | 1 | 52    | 4.7     | 1    | U | R.DMQINFDKFPN.S + Oxidation (M)                   |
| <a href="#">301</a> | 79    | 93  | 944.4710  | 1886.9275 | 1886.8985 | 15.4 | 1 | 76    | 0.025   | 1    | U | R.DMQINFDKFPNSFLR.Y + Oxidation (M)               |
| <a href="#">73</a>  | 87    | 93  | 440.7439  | 879.4732  | 879.4603  | 14.7 | 0 | 40    | 56      | 3    | U | K.FPNSFLR.Y                                       |
| <a href="#">153</a> | 94    | 103 | 626.3664  | 1250.7182 | 1250.7023 | 12.7 | 0 | 52    | 3.2     | 4    | U | R.YLIEVIAFQR.S                                    |
| <a href="#">45</a>  | 104   | 110 | 419.2350  | 836.4554  | 836.4392  | 19.3 | 0 | 51    | 3.3     | 1    | U | R.SDIFSLR.A                                       |
| <a href="#">318</a> | 122   | 139 | 1030.5959 | 2059.1772 | 2059.1452 | 15.5 | 0 | 85    | 0.0029  | 1    | U | R.DILVSSYLDELKPIIDK.Y                             |
| <a href="#">205</a> | 140   | 151 | 727.8805  | 1453.7465 | 1453.7313 | 10.5 | 0 | 61    | 0.7     | 1    | U | K.YQIINNSVNYAR.Y                                  |
| <a href="#">206</a> | 140   | 151 | 727.8857  | 1453.7568 | 1453.7313 | 17.5 | 0 | 90    | 0.00082 | 1    | U | K.YQIINNSVNYAR.Y                                  |
| <a href="#">207</a> | 140   | 151 | 728.3762  | 1454.7378 | 1454.7153 | 15.4 | 0 | 65    | 0.31    | 1    | U | K.YQIINNSVNYAR.Y + Deamidated (NQ)                |
| <a href="#">208</a> | 140   | 151 | 728.3813  | 1454.7480 | 1454.7153 | 22.4 | 0 | 44    | 36      | 1    | U | K.YQIINNSVNYAR.Y + Deamidated (NQ)                |
| <a href="#">209</a> | 140   | 151 | 728.3864  | 1454.7582 | 1454.7153 | 29.5 | 0 | 56    | 2.2     | 1    | U | K.YQIINNSVNYAR.Y + Deamidated (NQ)                |
| <a href="#">342</a> | 152   | 172 | 1240.5819 | 2479.1492 | 2479.1035 | 18.4 | 0 | 58    | 2.1     | 1    | U | R.YYQNMPPNMASSFLASEIQK.K + 2 Oxidation (M)        |
| <a href="#">176</a> | 192   | 203 | 671.4120  | 1340.8094 | 1340.7962 | 9.87 | 1 | 92    | 0.0003  | 1    | U | R.KLGMNLLLAVNR.G                                  |
| <a href="#">179</a> | 192   | 203 | 679.4158  | 1356.8171 | 1356.7911 | 19.2 | 1 | 98    | 7.8e-05 | 1    | U | R.KLGMNLLLAVNR.G + Oxidation (M)                  |
| <a href="#">150</a> | 193   | 203 | 607.3676  | 1212.7206 | 1212.7012 | 16.0 | 0 | 112   | 3.2e-06 | 1    | U | K.LGMNLLLAVNR.G                                   |
| <a href="#">151</a> | 193   | 203 | 615.3664  | 1228.7182 | 1228.6962 | 18.0 | 0 | 64    | 0.26    | 1    | U | K.LGMNLLLAVNR.G + Oxidation (M)                   |
| <a href="#">264</a> | 211   | 225 | 826.9574  | 1651.9003 | 1651.8821 | 11.0 | 0 | 68    | 0.14    | 1    | U | K.LVVISYEGLPGSQYK.T                               |
| <a href="#">157</a> | 232   | 243 | 636.3289  | 1270.6433 | 1270.6194 | 18.8 | 0 | 49    | 11      | 1    |   | K.GITFDSGGYNIK.T                                  |
| <a href="#">144</a> | 277   | 287 | 598.8649  | 1195.7153 | 1195.6925 | 19.1 | 0 | 64    | 0.13    | 1    | U | N.VVAVLPLTDNR.L                                   |
| <a href="#">198</a> | 288   | 300 | 714.8590  | 1427.7035 | 1427.6793 | 16.9 | 0 | 86    | 0.002   | 1    | U | R.LNGDANTPDAVWR.S                                 |
| <a href="#">199</a> | 288   | 300 | 714.8616  | 1427.7086 | 1427.6793 | 20.5 | 0 | 53    | 5       | 1    | U | R.LNGDANTPDAVWR.S                                 |
| <a href="#">200</a> | 288   | 300 | 715.3451  | 1428.6757 | 1428.6633 | 8.64 | 0 | 95    | 0.00028 | 1    | U | R.LNGDANTPDAVWR.S + Deamidated (NQ)               |
| <a href="#">201</a> | 288   | 300 | 715.3477  | 1428.6807 | 1428.6633 | 12.2 | 0 | 98    | 0.00016 | 1    | U | R.LNGDANTPDAVWR.S + Deamidated (NQ)               |
| <a href="#">174</a> | 318   | 329 | 666.9131  | 1331.8116 | 1331.7812 | 22.8 | 0 | 89    | 0.00054 | 1    |   | R.LILADAITYAIR.Q                                  |
| <a href="#">302</a> | 330   | 347 | 951.5486  | 1901.0827 | 1901.0469 | 18.9 | 1 | 70    | 0.096   | 1    | U | R.QEKASEIATLTGAIR.I + Deamidated (NQ)             |
| <a href="#">226</a> | 333   | 347 | 758.4526  | 1514.8906 | 1514.8668 | 15.7 | 0 | 103   | 3.5e-05 | 1    | U | K.ASEIATLTGAIR.I                                  |
| <a href="#">270</a> | 348   | 363 | 849.9214  | 1697.8282 | 1697.8148 | 7.86 | 0 | 32    | 6.5e+02 | 2    | U | R.IALGETFTGAFANEK.I + Deamidated (NQ)             |
| <a href="#">96</a>  | 374   | 381 | 487.2696  | 972.5246  | 972.5029  | 22.3 | 0 | 49    | 9.7     | 1    |   | K.EAGELIWR.M                                      |
| <a href="#">213</a> | 382   | 393 | 735.3812  | 1468.7478 | 1468.7245 | 15.8 | 0 | 76    | 0.022   | 1    | U | R.MPLHQDFAQNIR.D                                  |
| <a href="#">218</a> | 382   | 393 | 743.3770  | 1484.7395 | 1484.7194 | 13.5 | 0 | 52    | 5.5     | 1    | U | R.MPLHQDFAQNIR.D + Oxidation (M)                  |
| <a href="#">219</a> | 382   | 393 | 743.8675  | 1485.7205 | 1485.7034 | 11.5 | 0 | 35    | 3.2e+02 | 1    | U | R.MPLHQDFAQNIR.D + Deamidated (NQ); Oxidation (M) |
| <a href="#">107</a> | 449   | 457 | 518.3173  | 1034.6201 | 1034.6012 | 18.3 | 0 | 48    | 6.6     | 1    | U | R.SLVEYLAK.Q                                      |

## Band 6 47 kDa

[2::Q4A9M4](#) Mass: 51376 Score: 3765 Matches: 82(39) Sequences: 51(25) emPAI: 14.21 tr|Q4A9M4|pepA Leucyl aminopeptidase Tax\_Id=262719 [Mycoplasma hyopneumoniae (strain J / ATCC 25934 / NCTC 10110)]

Protein sequence coverage: 68%

1 MKNFSEIFIK YSNKFESNRI TIEPAYSDSQ IPMLIKEDLA ITEYLGQKKA

51 **YINLGSRSKE** LTPNRFKIA AKLGHYPRDM **QINFDKFPNS** **FLRYLIEVIA**  
 101 **FQRSDFISLR** ADYAKNRAKN **RDILVVSSYL** **DELKPIIDKY** **QIINNSVNYA**  
 151 **RYYQNMPPNM** **ASSEFLASEI** **QKMMNLNPKL** TVKVLGENEV **RKLGMNLLLA**  
 201 **VNRGSTYDAK** **LVVISYEGLP** **GSQYKTAFIG** KGITFDSGGY **NIKTGMYMND**  
 251 MKIDMSGAIL **CAAIDALSQ** **FNPLANVVAV** **LPLTDNRLNG** **DANTPDAVWR**  
 301 SMNGKTVEIN NTDAEGRIL **ADAITYAIRQ** **EKASEIISIA** **TLTGAIIRAL**  
 351 **GETFTGAFAN** **EKIWKNFNE** ASKEAGELIW **RMPLHQDFAQ** **NIRDSKVADL**  
 401 **KNTDFSGKAG** **SSSAAMFLAE** **FVEDKPFHIL** **DIAATAFVKN** **TPTGVMVRSL**  
 451 **VEYLAKQN**

| Query               | Start | End | Observed  | Mr(expt)  | Mr(calc)  | ppm  | M | Score | Expect  | Rank | U | Peptide                                              |
|---------------------|-------|-----|-----------|-----------|-----------|------|---|-------|---------|------|---|------------------------------------------------------|
| <a href="#">79</a>  | 3     | 10  | 499.2778  | 996.5411  | 996.5280  | 13.1 | 0 | 44    | 18      | 1    | U | K.NFSEIFIK.Y                                         |
| <a href="#">269</a> | 20    | 33  | 782.8919  | 1563.7693 | 1563.7490 | 13.0 | 0 | 36    | 2.6e+02 | 1    | U | R.ITIEPAYSDSQIPM.L                                   |
| <a href="#">277</a> | 20    | 33  | 790.8884  | 1579.7623 | 1579.7440 | 11.6 | 0 | 51    | 8       | 1    | U | R.ITIEPAYSDSQIPM.L + Oxidation (M)                   |
| <a href="#">335</a> | 20    | 36  | 960.0162  | 1918.0179 | 1918.0121 | 3.02 | 0 | 70    | 0.11    | 1    | U | R.ITIEPAYSDSQIPMLIK.E                                |
| <a href="#">338</a> | 20    | 36  | 968.0264  | 1934.0382 | 1934.0070 | 16.1 | 0 | 61    | 0.85    | 1    | U | R.ITIEPAYSDSQIPMLIK.E + Oxidation (M)                |
| <a href="#">146</a> | 26    | 36  | 655.8374  | 1309.6603 | 1309.6588 | 1.21 | 0 | 69    | 0.099   | 1    | U | A.YSDSQIPMLIK.E + Oxidation (M)                      |
| <a href="#">315</a> | 34    | 48  | 867.4936  | 1732.9727 | 1732.9611 | 6.69 | 1 | 68    | 0.13    | 1    | U | M.LIKEDLAITEYLGQK.K                                  |
| <a href="#">168</a> | 37    | 48  | 690.3671  | 1378.7196 | 1378.6980 | 15.6 | 0 | 81    | 0.0061  | 1    | U | K.EDLAITEYLGQK.K                                     |
| <a href="#">54</a>  | 50    | 57  | 447.2532  | 892.4919  | 892.4766  | 17.1 | 0 | 29    | 6.6e+02 | 1    | U | K.AYINLGS.R.S                                        |
| <a href="#">85</a>  | 79    | 86  | 505.7402  | 1009.4658 | 1009.4539 | 11.8 | 0 | 48    | 7.9     | 1    | U | R.DMQINFDK.F                                         |
| <a href="#">169</a> | 79    | 89  | 692.8220  | 1383.6294 | 1383.6129 | 11.9 | 1 | 61    | 0.56    | 1    | U | R.DMQINFDKFPN.S + Oxidation (M)                      |
| <a href="#">288</a> | 79    | 91  | 801.8799  | 1601.7452 | 1601.7184 | 16.7 | 1 | 44    | 42      | 1    | U | R.DMQINFDKFPNSF.L                                    |
| <a href="#">293</a> | 79    | 91  | 809.8701  | 1617.7257 | 1617.7133 | 7.61 | 1 | 56    | 2.2     | 1    | U | R.DMQINFDKFPNSF.L + Oxidation (M)                    |
| <a href="#">327</a> | 79    | 93  | 936.9619  | 1871.9093 | 1871.8876 | 11.6 | 1 | 71    | 0.094   | 1    | U | R.DMQINFDKFPNSFLR.Y + Deamidated (NQ)                |
| <a href="#">329</a> | 79    | 93  | 944.9628  | 1887.9111 | 1887.8825 | 15.1 | 1 | 47    | 23      | 1    | U | R.DMQINFDKFPNSFLR.Y + Deamidated (NQ); Oxidation (M) |
| <a href="#">128</a> | 94    | 103 | 626.3617  | 1250.7088 | 1250.7023 | 5.17 | 0 | 66    | 0.13    | 1    | U | R.YLIEVIAFQR.S                                       |
| <a href="#">222</a> | 122   | 134 | 747.4171  | 1492.8196 | 1492.8025 | 11.5 | 0 | 93    | 0.00041 | 1    | U | R.DILVVSSYLDELK.P                                    |
| <a href="#">351</a> | 122   | 139 | 1030.5807 | 2059.1469 | 2059.1452 | 0.78 | 0 | 46    | 28      | 2    | U | R.DILVVSSYLDELKPIIDK.Y                               |
| <a href="#">352</a> | 122   | 139 | 1030.5837 | 2059.1529 | 2059.1452 | 3.73 | 0 | 79    | 0.012   | 1    | U | R.DILVVSSYLDELKPIIDK.Y                               |
| <a href="#">353</a> | 122   | 139 | 1030.5898 | 2059.1651 | 2059.1452 | 9.64 | 0 | 100   | 8.7e-05 | 1    | U | R.DILVVSSYLDELKPIIDK.Y                               |
| <a href="#">366</a> | 122   | 140 | 1112.1210 | 2222.2275 | 2222.2086 | 8.52 | 1 | 51    | 7.9     | 1    | U | R.DILVVSSYLDELKPIIDKY.Q                              |
| <a href="#">156</a> | 129   | 139 | 673.8944  | 1345.7743 | 1345.7493 | 18.6 | 0 | 63    | 0.37    | 1    | U | S.YLDELKPIIDK.Y                                      |
| <a href="#">117</a> | 130   | 139 | 592.3607  | 1182.7069 | 1182.6860 | 17.7 | 0 | 54    | 1.6     | 4    | U | Y.LDELKPIIDK.Y                                       |
| <a href="#">121</a> | 140   | 149 | 614.3100  | 1226.6055 | 1226.5931 | 10.0 | 0 | 27    | 1.6e+03 | 7    | U | K.YQIINNSVNY.A                                       |
| <a href="#">198</a> | 140   | 151 | 727.8805  | 1453.7465 | 1453.7313 | 10.5 | 0 | 50    | 9.7     | 1    | U | K.YQIINNSVNYAR.Y                                     |
| <a href="#">199</a> | 140   | 151 | 728.3710  | 1454.7275 | 1454.7153 | 8.38 | 0 | 90    | 0.00093 | 1    | U | K.YQIINNSVNYAR.Y + Deamidated (NQ)                   |
| <a href="#">392</a> | 152   | 172 | 1224.5843 | 2447.1541 | 2447.1137 | 16.5 | 0 | 45    | 46      | 1    | U | R.YYQNMPPNMASSEFLASEIQK.K                            |
| <a href="#">395</a> | 152   | 172 | 1232.5751 | 2463.1356 | 2463.1086 | 11.0 | 0 | 59    | 1.5     | 1    | U | R.YYQNMPPNMASSEFLASEIQK.K + Oxidation (M)            |
| <a href="#">398</a> | 152   | 172 | 1240.5752 | 2479.1359 | 2479.1035 | 13.0 | 0 | 59    | 1.7     | 1    | U | R.YYQNMPPNMASSEFLASEIQK.K + 2 Oxidation (M)          |
| <a href="#">328</a> | 156   | 172 | 940.4543  | 1878.8941 | 1878.8855 | 4.55 | 0 | 74    | 0.042   | 1    | U | N.MPPNMASSEFLASEIQK.K                                |
| <a href="#">330</a> | 156   | 172 | 948.4584  | 1894.9023 | 1894.8804 | 11.5 | 0 | 86    | 0.0027  | 1    | U | N.MPPNMASSEFLASEIQK.K + Oxidation (M)                |
| <a href="#">331</a> | 156   | 172 | 948.4613  | 1894.9081 | 1894.8804 | 14.6 | 0 | 79    | 0.013   | 1    | U | N.MPPNMASSEFLASEIQK.K + Oxidation (M)                |
| <a href="#">333</a> | 156   | 172 | 956.4613  | 1910.9081 | 1910.8754 | 17.1 | 0 | 76    | 0.026   | 1    | U | N.MPPNMASSEFLASEIQK.K + 2 Oxidation (M)              |
| <a href="#">191</a> | 160   | 172 | 720.8606  | 1439.7067 | 1439.6966 | 7.00 | 0 | 111   | 7e-06   | 1    | U | N.MASSEFLASEIQK.K                                    |
| <a href="#">144</a> | 161   | 172 | 655.3357  | 1308.6568 | 1308.6561 | 0.51 | 0 | 37    | 1.7e+02 | 3    | U | M.ASSEFLASEIQK.K                                     |
| <a href="#">155</a> | 192   | 203 | 671.4071  | 1340.7996 | 1340.7962 | 2.55 | 1 | 109   | 6.1e-06 | 1    | U | R.KLGMNLLAVNR.G                                      |
| <a href="#">159</a> | 192   | 203 | 679.4084  | 1356.8023 | 1356.7911 | 8.27 | 1 | 102   | 3.9e-05 | 1    | U | R.KLGMNLLAVNR.G + Oxidation (M)                      |
| <a href="#">120</a> | 193   | 203 | 607.3606  | 1212.7066 | 1212.7012 | 4.42 | 0 | 88    | 0.00096 | 1    | U | K.LGMNLLAVNR.G                                       |
| <a href="#">123</a> | 193   | 203 | 615.3593  | 1228.7041 | 1228.6962 | 6.50 | 0 | 77    | 0.014   | 1    | U | K.LGMNLLAVNR.G + Oxidation (M)                       |
| <a href="#">56</a>  | 196   | 203 | 456.7920  | 911.5695  | 911.5552  | 15.7 | 0 | 52    | 1.5     | 1    | U | M.NLLAVNR.G                                          |

| Query               | Start | End | Observed  | Mr(expt)  | Mr(calc)  | ppm   | M | Score | Expect  | Rank | U | Peptide                                           |
|---------------------|-------|-----|-----------|-----------|-----------|-------|---|-------|---------|------|---|---------------------------------------------------|
| <a href="#">296</a> | 211   | 225 | 826.9574  | 1651.9003 | 1651.8821 | 11.0  | 0 | 71    | 0.074   | 1    | U | K.LVVISYEGLPGSQYK.T                               |
| <a href="#">297</a> | 211   | 225 | 826.9601  | 1651.9057 | 1651.8821 | 14.3  | 0 | 58    | 1.4     | 1    | U | K.LVVISYEGLPGSQYK.T                               |
| <a href="#">132</a> | 232   | 243 | 636.3361  | 1270.6576 | 1270.6194 | 30.1  | 0 | 61    | 0.7     | 1    |   | K.GITFDSGGYNIK.T                                  |
| <a href="#">415</a> | 262   | 287 | 1347.2512 | 2692.4879 | 2692.4548 | 12.3  | 0 | 89    | 0.0017  | 1    | U | C.AAAIDALSQFNPLANVVAVLPLTDNR.L                    |
| <a href="#">410</a> | 263   | 287 | 1311.7272 | 2621.4398 | 2621.4177 | 8.44  | 0 | 103   | 5.7e-05 | 1    | U | A.AAIDALSQFNPLANVVAVLPLTDNR.L                     |
| <a href="#">406</a> | 264   | 287 | 1276.2143 | 2550.4141 | 2550.3806 | 13.2  | 0 | 129   | 1.6e-07 | 1    | U | A.AIDALSQFNPLANVVAVLPLTDNR.L                      |
| <a href="#">372</a> | 267   | 287 | 1126.6441 | 2251.2737 | 2251.2325 | 18.3  | 0 | 109   | 1.4e-05 | 1    | U | D.ALSQFNPLANVVAVLPLTDNR.L                         |
| <a href="#">354</a> | 269   | 287 | 1034.5660 | 2067.1175 | 2067.1113 | 3.01  | 0 | 111   | 8.8e-06 | 1    | U | L.SQFNPLANVVAVLPLTDNR.L                           |
| <a href="#">284</a> | 273   | 287 | 796.4682  | 1590.9218 | 1590.9093 | 7.83  | 0 | 97    | 0.00016 | 1    | U | N.PLANVVAVLPLTDNR.L                               |
| <a href="#">118</a> | 277   | 287 | 598.8603  | 1195.7060 | 1195.6925 | 11.3  | 0 | 72    | 0.025   | 1    |   | N.VVAVLPLTDNR.L                                   |
| <a href="#">184</a> | 288   | 300 | 714.8565  | 1427.6984 | 1427.6793 | 13.4  | 0 | 79    | 0.012   | 1    | U | R.LNGDANTPDVAVWR.S                                |
| <a href="#">185</a> | 288   | 300 | 715.3426  | 1428.6706 | 1428.6633 | 5.09  | 0 | 68    | 0.14    | 1    | U | R.LNGDANTPDVAVWR.S + Deamidated (NQ)              |
| <a href="#">186</a> | 288   | 300 | 715.3451  | 1428.6757 | 1428.6633 | 8.64  | 0 | 77    | 0.018   | 1    | U | R.LNGDANTPDVAVWR.S + Deamidated (NQ)              |
| <a href="#">150</a> | 318   | 329 | 666.8935  | 1331.7725 | 1331.7812 | -6.58 | 0 | 78    | 0.012   | 1    |   | R.LILADAITYAIR.Q                                  |
| <a href="#">151</a> | 318   | 329 | 666.9033  | 1331.7921 | 1331.7812 | 8.11  | 0 | 41    | 40      | 3    |   | R.LILADAITYAIR.Q                                  |
| <a href="#">152</a> | 318   | 329 | 666.9057  | 1331.7969 | 1331.7812 | 11.8  | 0 | 60    | 0.57    | 1    |   | R.LILADAITYAIR.Q                                  |
| <a href="#">312</a> | 318   | 332 | 859.9950  | 1717.9754 | 1717.9614 | 8.14  | 1 | 31    | 6e+02   | 10   | U | R.LILADAITYAIRQEK.A + Deamidated (NQ)             |
| <a href="#">332</a> | 330   | 347 | 951.5311  | 1901.0477 | 1901.0469 | 0.42  | 1 | 83    | 0.0046  | 1    | U | R.QEKASEIISATLTGAIR.I + Deamidated (NQ)           |
| <a href="#">234</a> | 333   | 347 | 758.4004  | 1514.7863 | 1514.8668 | -53.1 | 0 | 116   | 2.2e-06 | 1    | U | K.ASEIISATLTGAIR.I                                |
| <a href="#">235</a> | 333   | 347 | 758.4421  | 1514.8697 | 1514.8668 | 1.95  | 0 | 64    | 0.27    | 1    | U | K.ASEIISATLTGAIR.I                                |
| <a href="#">236</a> | 333   | 347 | 758.4474  | 1514.8802 | 1514.8668 | 8.84  | 0 | 101   | 5.2e-05 | 1    | U | K.ASEIISATLTGAIR.I                                |
| <a href="#">237</a> | 333   | 347 | 758.4500  | 1514.8854 | 1514.8668 | 12.3  | 0 | 86    | 0.0019  | 1    | U | K.ASEIISATLTGAIR.I                                |
| <a href="#">238</a> | 333   | 347 | 758.4526  | 1514.8906 | 1514.8668 | 15.7  | 0 | 86    | 0.0015  | 1    | U | K.ASEIISATLTGAIR.I                                |
| <a href="#">239</a> | 333   | 347 | 758.4552  | 1514.8958 | 1514.8668 | 19.2  | 0 | 120   | 6.4e-07 | 1    | U | K.ASEIISATLTGAIR.I                                |
| <a href="#">122</a> | 336   | 347 | 614.8921  | 1227.7696 | 1227.7551 | 11.9  | 0 | 89    | 0.00045 | 1    | U | E.IISATLTGAIR.I                                   |
| <a href="#">306</a> | 348   | 363 | 849.4219  | 1696.8292 | 1696.8308 | -0.97 | 0 | 98    | 0.00017 | 1    | U | R.IALGETFTGAFANEEK.I                              |
| <a href="#">307</a> | 348   | 363 | 849.4246  | 1696.8347 | 1696.8308 | 2.28  | 0 | 66    | 0.23    | 1    | U | R.IALGETFTGAFANEEK.I                              |
| <a href="#">308</a> | 348   | 363 | 849.4412  | 1696.8678 | 1696.8308 | 21.8  | 0 | 74    | 0.037   | 1    | U | R.IALGETFTGAFANEEK.I                              |
| <a href="#">282</a> | 349   | 363 | 792.8919  | 1583.7692 | 1583.7467 | 14.2  | 0 | 118   | 1.6e-06 | 1    | U | I.ALGETFTGAFANEEK.I                               |
| <a href="#">68</a>  | 374   | 381 | 487.2675  | 972.5204  | 972.5029  | 18.0  | 0 | 58    | 1.2     | 1    |   | K.EAGELIWR.M                                      |
| <a href="#">218</a> | 382   | 393 | 743.3796  | 1484.7447 | 1484.7194 | 17.0  | 0 | 38    | 1.5e+02 | 1    | U | R.MPLHQDFAQNIR.D + Oxidation (M)                  |
| <a href="#">219</a> | 382   | 393 | 743.8650  | 1485.7154 | 1485.7034 | 8.04  | 0 | 25    | 2.8e+03 | 1    | U | R.MPLHQDFAQNIR.D + Deamidated (NQ); Oxidation (M) |
| <a href="#">220</a> | 382   | 393 | 743.8701  | 1485.7257 | 1485.7034 | 15.0  | 0 | 61    | 0.81    | 1    | U | R.MPLHQDFAQNIR.D + Deamidated (NQ); Oxidation (M) |
| <a href="#">281</a> | 382   | 394 | 792.8892  | 1583.7639 | 1583.7514 | 7.84  | 1 | 50    | 8.7     | 1    | U | R.MPLHQDFAQNIRD.S                                 |
| <a href="#">287</a> | 382   | 394 | 800.8989  | 1599.7833 | 1599.7464 | 23.1  | 1 | 54    | 3.9     | 1    | U | R.MPLHQDFAQNIRD.S + Oxidation (M)                 |
| <a href="#">316</a> | 409   | 425 | 880.4185  | 1758.8225 | 1758.8134 | 5.16  | 0 | 95    | 0.00037 | 1    | U | K.AGSSAAMFLAEFVEDK.P                              |
| <a href="#">319</a> | 409   | 425 | 888.4231  | 1774.8316 | 1774.8084 | 13.1  | 0 | 120   | 1.1e-06 | 1    | U | K.AGSSAAMFLAEFVEDK.P + Oxidation (M)              |
| <a href="#">347</a> | 409   | 427 | 1002.4821 | 2002.9496 | 2002.9346 | 7.46  | 0 | 110   | 1.3e-05 | 1    | U | K.AGSSAAMFLAEFVEDKPF.I                            |
| <a href="#">349</a> | 409   | 427 | 1010.4865 | 2018.9585 | 2018.9295 | 14.3  | 0 | 91    | 0.001   | 1    | U | K.AGSSAAMFLAEFVEDKPF.I + Oxidation (M)            |
| <a href="#">397</a> | 418   | 439 | 1237.6858 | 2473.3570 | 2473.3257 | 12.7  | 0 | 82    | 0.0079  | 1    | U | F.LAEFVEDKPFHLDIAATAFVK.N                         |
| <a href="#">76</a>  | 440   | 448 | 495.7639  | 989.5133  | 989.4964  | 17.0  | 0 | 34    | 3.2e+02 | 1    | U | K.NTPTGVMVR.S + Oxidation (M)                     |
| <a href="#">92</a>  | 449   | 457 | 518.3087  | 1034.6029 | 1034.6012 | 1.67  | 0 | 48    | 6.9     | 1    | U | R.SLVEYILAK.Q                                     |

## Band 7 45 kDa

[2::Q4A9M4](#) Mass: 51376 Score: 3660 Matches: 98(42) Sequences: 51(23) emPAI: 25.54 tr|Q4A9M4|pepA Leucyl aminopeptidase Tax\_Id=262719 [Mycoplasma hyopneumoniae (strain J / ATCC 25934 / NCTC 10110)]

Protein sequence coverage: 74%



|     |            |            |            |            |             |
|-----|------------|------------|------------|------------|-------------|
| 1   | MKNFSEIFIK | YSNKFESNRI | TIEPAYSDSQ | IPMLIKEDLA | ITEYLGQKKA  |
| 51  | YINLGSRSKE | LTPNRFKIA  | AKLGHYPRDM | QINFDKFPNS | FLRYLIEVIA  |
| 101 | FQRSDIFSLR | ADYAKNRAKN | RDILVVSSYL | DELKPIIDKY | QIINNSVNYA  |
| 151 | RYYQNMPPNM | ASSEFLASEI | QKKMNLNPKL | TVKVLGENEV | RKLGMNLLLA  |
| 201 | VNRGSTYDAK | LVVISYEGLP | GSQYKTAFIG | KGITFDSGGY | NIKTGMYMND  |
| 251 | MKIDMSGAIL | CAAIDALSQ  | FNPLANVVAV | LPLTDNRLNG | DANTPDAVWR  |
| 301 | SMNGKTVEIN | NTDAEGRLLI | ADAITYAIRQ | EKASEISIA  | TLTGAIIRIAL |
| 351 | GETFTGAFAN | EKKIWKNFNE | ASKEAGELIW | RMPLHQDFAQ | NIRDSKVADL  |
| 401 | KNTDFSGKAG | SSSAAMFLAE | FVEDKPFHIL | DIAATAFVKN | TPTGVMVRSL  |
| 451 | VEYILAKQN  |            |            |            |             |

| Query               | Start | End | Observed | Mr(expt)  | Mr(calc)  | ppm       | M Score | Expect | Rank | U       | Peptide |                                                                              |
|---------------------|-------|-----|----------|-----------|-----------|-----------|---------|--------|------|---------|---------|------------------------------------------------------------------------------|
| <a href="#">102</a> | 1     | -   | 10       | 636.8497  | 1271.6848 | 1271.6584 | 20.8    | 1      | 63   | 0.42    | 1       | U -.MKNFSEIFIK.Y + Oxidation (M)                                             |
| <a href="#">50</a>  | 3     | -   | 10       | 499.2757  | 996.5369  | 996.5280  | 8.89    | 0      | 43   | 23      | 2       | U K.NFSEIFIK.Y                                                               |
| <a href="#">52</a>  | 3     | -   | 10       | 499.7687  | 997.5229  | 997.5120  | 10.9    | 0      | 62   | 0.33    | 1       | U K.NFSEIFIK.Y + Deamidated (NQ)                                             |
| <a href="#">251</a> | 20    | -   | 33       | 782.8866  | 1563.7587 | 1563.7490 | 6.19    | 0      | 56   | 2.2     | 1       | U R.ITIEPAYSDSQIPM.L                                                         |
| <a href="#">252</a> | 20    | -   | 33       | 782.8893  | 1563.7640 | 1563.7490 | 9.57    | 0      | 53   | 4.7     | 1       | U R.ITIEPAYSDSQIPM.L                                                         |
| <a href="#">257</a> | 20    | -   | 33       | 790.8884  | 1579.7623 | 1579.7440 | 11.6    | 0      | 66   | 0.24    | 1       | U R.ITIEPAYSDSQIPM.L + Oxidation (M)                                         |
| <a href="#">314</a> | 20    | -   | 36       | 960.0221  | 1918.0296 | 1918.0121 | 9.14    | 0      | 58   | 1.6     | 1       | U R.ITIEPAYSDSQIPMLIK.E                                                      |
| <a href="#">317</a> | 20    | -   | 36       | 968.0205  | 1934.0264 | 1934.0070 | 10.0    | 0      | 58   | 1.8     | 1       | U R.ITIEPAYSDSQIPMLIK.E + Oxidation (M)                                      |
| <a href="#">431</a> | 20    | -   | 48       | 1099.2454 | 3294.7143 | 3294.6945 | 6.03    | 1      | 46   | 35      | 1       | U R.ITIEPAYSDSQIPMLIKEDLAITEYLGQK.K + Oxidation (M)                          |
| <a href="#">110</a> | 26    | -   | 36       | 647.8488  | 1293.6831 | 1293.6638 | 14.8    | 0      | 71   | 0.058   | 1       | U A.YSDSQIPMLIK.E                                                            |
| <a href="#">118</a> | 26    | -   | 36       | 655.8471  | 1309.6797 | 1309.6588 | 16.0    | 0      | 82   | 0.0045  | 1       | U A.YSDSQIPMLIK.E + Oxidation (M)                                            |
| <a href="#">296</a> | 34    | -   | 48       | 867.4992  | 1732.9838 | 1732.9611 | 13.1    | 1      | 66   | 0.22    | 1       | U M.LIKEDLAITEYLGQK.K                                                        |
| <a href="#">142</a> | 37    | -   | 48       | 690.3745  | 1378.7345 | 1378.6980 | 26.5    | 0      | 47   | 17      | 1       | U K.EDLAITEYLGQK.K                                                           |
| <a href="#">143</a> | 37    | -   | 48       | 690.4093  | 1378.8041 | 1378.6980 | 77.0    | 0      | 47   | 12      | 1       | U K.EDLAITEYLGQK.K                                                           |
| <a href="#">79</a>  | 39    | -   | 48       | 568.3344  | 1134.6543 | 1134.6284 | 22.7    | 0      | 55   | 1.9     | 1       | U D.LAITEYLGQK.K                                                             |
| <a href="#">27</a>  | 50    | -   | 57       | 447.2492  | 892.4839  | 892.4766  | 8.15    | 0      | 30   | 5.4e+02 | 3       | U K.AYINLGSRS                                                                |
| <a href="#">28</a>  | 50    | -   | 57       | 447.2512  | 892.4879  | 892.4766  | 12.6    | 0      | 32   | 3.6e+02 | 3       | U K.AYINLGSRS                                                                |
| <a href="#">55</a>  | 79    | -   | 86       | 505.7423  | 1009.4700 | 1009.4539 | 16.0    | 0      | 43   | 28      | 1       | U R.DMQINFDK.F                                                               |
| <a href="#">139</a> | 79    | -   | 89       | 684.8210  | 1367.6275 | 1367.6180 | 6.98    | 1      | 59   | 0.84    | 1       | U R.DMQINFDKFPN.S                                                            |
| <a href="#">145</a> | 79    | -   | 89       | 692.8195  | 1383.6244 | 1383.6129 | 8.30    | 1      | 51   | 6.1     | 1       | U R.DMQINFDKFPN.S + Oxidation (M)                                            |
| <a href="#">269</a> | 79    | -   | 91       | 801.8745  | 1601.7345 | 1601.7184 | 10.0    | 1      | 35   | 3e+02   | 1       | U R.DMQINFDKFPNSF.L                                                          |
| <a href="#">271</a> | 79    | -   | 91       | 809.8728  | 1617.7311 | 1617.7133 | 10.9    | 1      | 60   | 1       | 1       | U R.DMQINFDKFPNSF.L + Oxidation (M)                                          |
| <a href="#">305</a> | 79    | -   | 93       | 936.9561  | 1871.8977 | 1871.8876 | 5.38    | 1      | 73   | 0.056   | 1       | U R.DMQINFDKFPNSFLR.Y + Deamidated (NQ)                                      |
| <a href="#">308</a> | 79    | -   | 93       | 944.4594  | 1886.9042 | 1886.8985 | 3.04    | 1      | 87   | 0.0025  | 1       | U R.DMQINFDKFPNSFLR.Y + Oxidation (M)                                        |
| <a href="#">309</a> | 79    | -   | 93       | 944.9628  | 1887.9111 | 1887.8825 | 15.1    | 1      | 75   | 0.034   | 1       | U R.DMQINFDKFPNSFLR.Y + Deamidated (NQ); Oxidation (M)                       |
| <a href="#">310</a> | 79    | -   | 93       | 630.3130  | 1887.9171 | 1887.8825 | 18.3    | 1      | 47   | 22      | 1       | U R.DMQINFDKFPNSFLR.Y + Deamidated (NQ); Oxidation (M)                       |
| <a href="#">96</a>  | 94    | -   | 103      | 626.3640  | 1250.7135 | 1250.7023 | 8.96    | 0      | 76   | 0.013   | 1       | U R.YLIEVIAFQR.S                                                             |
| <a href="#">13</a>  | 104   | -   | 110      | 419.2330  | 836.4515  | 836.4392  | 14.7    | 0      | 55   | 1.4     | 1       | U R.SDIFSLR.A                                                                |
| <a href="#">373</a> | 120   | -   | 139      | 777.4339  | 2329.2799 | 2329.2893 | -4.01   | 1      | 64   | 0.43    | 1       | U K.NRDILVVSSYLDELKPIIDK.Y                                                   |
| <a href="#">374</a> | 120   | -   | 139      | 1166.1411 | 2330.2677 | 2330.2733 | -2.41   | 1      | 68   | 0.18    | 1       | U K.NRDILVVSSYLDELKPIIDK.Y + Deamidated (NQ)                                 |
| <a href="#">337</a> | 122   | -   | 139      | 1030.5807 | 2059.1469 | 2059.1452 | 0.78    | 0      | 74   | 0.043   | 1       | U R.DILVVSSYLDELKPIIDK.Y                                                     |
| <a href="#">338</a> | 122   | -   | 139      | 1030.5837 | 2059.1529 | 2059.1452 | 3.73    | 0      | 42   | 67      | 2       | U R.DILVVSSYLDELKPIIDK.Y                                                     |
| <a href="#">339</a> | 122   | -   | 139      | 1030.5898 | 2059.1651 | 2059.1452 | 9.64    | 0      | 50   | 8.8     | 1       | U R.DILVVSSYLDELKPIIDK.Y                                                     |
| <a href="#">359</a> | 122   | -   | 140      | 1112.1305 | 2222.2465 | 2222.2086 | 17.0    | 1      | 67   | 0.22    | 1       | U R.DILVVSSYLDELKPIIDKY.Q                                                    |
| <a href="#">319</a> | 123   | -   | 139      | 973.0758  | 1944.1371 | 1944.1183 | 9.69    | 0      | 64   | 0.31    | 1       | U D.ILVVSSYLDELKPIIDK.Y                                                      |
| <a href="#">175</a> | 128   | -   | 139      | 717.3976  | 1432.7807 | 1432.7813 | -0.42   | 0      | 93   | 0.00043 | 1       | U S.SYLDELKPIIDK.Y                                                           |
| <a href="#">130</a> | 129   | -   | 139      | 673.8944  | 1345.7743 | 1345.7493 | 18.6    | 0      | 82   | 0.004   | 1       | U S.YLDELKPIIDK.Y                                                            |
| <a href="#">448</a> | 138   | -   | 172      | 1382.3346 | 4143.9819 | 4143.9193 | 15.1    | 2      | 39   | 1.9e+02 | 1       | U I.DKYQIINNSVNYARYYQNMPPNMASSEFLASEIQK.K + 2 Deamidated (NQ); Oxidation (M) |
| <a href="#">183</a> | 140   | -   | 151      | 727.8780  | 1453.7414 | 1453.7313 | 6.94    | 0      | 63   | 0.4     | 1       | U K.YQIINNSVNYAR.Y                                                           |
| <a href="#">184</a> | 140   | -   | 151      | 727.8857  | 1453.7568 | 1453.7313 | 17.5    | 0      | 70   | 0.088   | 1       | U K.YQIINNSVNYAR.Y                                                           |

| Query               | Start | End | Observed | Mr(expt)  | Mr(calc)  | ppm       | M Score | Expect | Rank | U       | Peptide |   |                                                   |
|---------------------|-------|-----|----------|-----------|-----------|-----------|---------|--------|------|---------|---------|---|---------------------------------------------------|
| <a href="#">187</a> | 140   | -   | 151      | 728.3736  | 1454.7326 | 1454.7153 | 11.9    | 0      | 72   | 0.056   | 1       | U | K.YQIINNSVNYAR.Y + Deamidated (NQ)                |
| <a href="#">382</a> | 152   | -   | 172      | 1224.5777 | 2447.1408 | 2447.1137 | 11.1    | 0      | 40   | 1.3e+02 | 1       | U | R.YYQNMPPNMASSEFLASEIQK.K                         |
| <a href="#">386</a> | 152   | -   | 172      | 1232.5784 | 2463.1423 | 2463.1086 | 13.7    | 0      | 56   | 3.6     | 1       | U | R.YYQNMPPNMASSEFLASEIQK.K + Oxidation (M)         |
| <a href="#">390</a> | 152   | -   | 172      | 1240.5752 | 2479.1359 | 2479.1035 | 13.0    | 0      | 82   | 0.0089  | 1       | U | R.YYQNMPPNMASSEFLASEIQK.K + 2 Oxidation (M)       |
| <a href="#">306</a> | 156   | -   | 172      | 940.4630  | 1878.9115 | 1878.8855 | 13.8    | 0      | 108  | 1.6e-05 | 1       | U | N.MPPNMASSEFLASEIQK.K                             |
| <a href="#">311</a> | 156   | -   | 172      | 948.4584  | 1894.9023 | 1894.8804 | 11.5    | 0      | 106  | 2.8e-05 | 1       | U | N.MPPNMASSEFLASEIQK.K + Oxidation (M)             |
| <a href="#">312</a> | 156   | -   | 172      | 948.4643  | 1894.9140 | 1894.8804 | 17.7    | 0      | 59   | 1.3     | 1       | U | N.MPPNMASSEFLASEIQK.K + Oxidation (M)             |
| <a href="#">313</a> | 156   | -   | 172      | 956.4584  | 1910.9022 | 1910.8754 | 14.0    | 0      | 80   | 0.01    | 1       | U | N.MPPNMASSEFLASEIQK.K + 2 Oxidation (M)           |
| <a href="#">177</a> | 160   | -   | 172      | 720.8632  | 1439.7118 | 1439.6966 | 10.5    | 0      | 51   | 6.6     | 1       | U | N.MASSEFLASEIQK.K                                 |
| <a href="#">128</a> | 192   | -   | 203      | 671.4071  | 1340.7996 | 1340.7962 | 2.55    | 1      | 90   | 0.00044 | 1       | U | R.KLGMNLLAVNR.G                                   |
| <a href="#">129</a> | 192   | -   | 203      | 671.9027  | 1341.7909 | 1341.7802 | 7.95    | 1      | 48   | 10      | 1       | U | R.KLGMNLLAVNR.G + Deamidated (NQ)                 |
| <a href="#">133</a> | 192   | -   | 203      | 679.4060  | 1356.7974 | 1356.7911 | 4.64    | 1      | 88   | 0.00092 | 1       | U | R.KLGMNLLAVNR.G + Oxidation (M)                   |
| <a href="#">134</a> | 192   | -   | 203      | 679.4158  | 1356.8171 | 1356.7911 | 19.2    | 1      | 88   | 0.0008  | 1       | U | R.KLGMNLLAVNR.G + Oxidation (M)                   |
| <a href="#">87</a>  | 193   | -   | 203      | 607.3629  | 1212.7113 | 1212.7012 | 8.27    | 0      | 92   | 0.00033 | 1       | U | K.LGMNLLAVNR.G                                    |
| <a href="#">89</a>  | 193   | -   | 203      | 615.3640  | 1228.7135 | 1228.6962 | 14.1    | 0      | 91   | 0.00053 | 1       | U | K.LGMNLLAVNR.G + Oxidation (M)                    |
| <a href="#">90</a>  | 193   | -   | 203      | 615.3640  | 1228.7135 | 1228.6962 | 14.1    | 0      | 77   | 0.013   | 1       | U | K.LGMNLLAVNR.G + Oxidation (M)                    |
| <a href="#">273</a> | 211   | -   | 225      | 826.9492  | 1651.8839 | 1651.8821 | 1.10    | 0      | 63   | 0.46    | 1       | U | K.LVVISYEGLPGSQYK.T                               |
| <a href="#">274</a> | 211   | -   | 225      | 826.9574  | 1651.9003 | 1651.8821 | 11.0    | 0      | 64   | 0.36    | 1       | U | K.LVVISYEGLPGSQYK.T                               |
| <a href="#">100</a> | 232   | -   | 243      | 636.3289  | 1270.6433 | 1270.6194 | 18.8    | 0      | 31   | 6e+02   | 1       |   | K.GITFDSGGYNIK.T                                  |
| <a href="#">101</a> | 232   | -   | 243      | 636.3337  | 1270.6529 | 1270.6194 | 26.4    | 0      | 60   | 0.74    | 1       |   | K.GITFDSGGYNIK.T                                  |
| <a href="#">72</a>  | 244   | -   | 252      | 545.7318  | 1089.4490 | 1089.4293 | 18.0    | 0      | 23   | 2.2e+03 | 7       | U | K.TGMYMNDMK.I                                     |
| <a href="#">414</a> | 262   | -   | 287      | 1347.2547 | 2692.4949 | 2692.4548 | 14.9    | 0      | 115  | 4.3e-06 | 1       | U | C.AAIDALSQFNPLANVVAVLPLTDNR.L                     |
| <a href="#">410</a> | 263   | -   | 287      | 1311.7340 | 2621.4535 | 2621.4177 | 13.7    | 0      | 142  | 8.2e-09 | 1       | U | A.AAIDALSQFNPLANVVAVLPLTDNR.L                     |
| <a href="#">404</a> | 264   | -   | 287      | 1276.2076 | 2550.4006 | 2550.3806 | 7.85    | 0      | 96   | 0.00035 | 1       | U | A.AIDALSQFNPLANVVAVLPLTDNR.L                      |
| <a href="#">366</a> | 267   | -   | 287      | 1126.6505 | 2251.2864 | 2251.2325 | 24.0    | 0      | 118  | 1.5e-06 | 1       | U | D.ALSQFNPLANVVAVLPLTDNR.L                         |
| <a href="#">264</a> | 273   | -   | 287      | 796.4682  | 1590.9218 | 1590.9093 | 7.83    | 0      | 90   | 0.0007  | 1       | U | N.PLANVVAVLPLTDNR.L                               |
| <a href="#">84</a>  | 277   | -   | 287      | 598.8649  | 1195.7153 | 1195.6925 | 19.1    | 0      | 64   | 0.14    | 1       |   | N.VVAVLPLTDNR.L                                   |
| <a href="#">168</a> | 288   | -   | 300      | 714.8489  | 1427.6833 | 1427.6793 | 2.74    | 0      | 84   | 0.0032  | 1       | U | R.LNGDANTPDAVWR.S                                 |
| <a href="#">169</a> | 288   | -   | 300      | 714.8590  | 1427.7035 | 1427.6793 | 16.9    | 0      | 90   | 0.00082 | 1       | U | R.LNGDANTPDAVWR.S                                 |
| <a href="#">170</a> | 288   | -   | 300      | 715.3477  | 1428.6807 | 1428.6633 | 12.2    | 0      | 87   | 0.0019  | 1       | U | R.LNGDANTPDAVWR.S + Deamidated (NQ)               |
| <a href="#">171</a> | 288   | -   | 300      | 715.3502  | 1428.6858 | 1428.6633 | 15.7    | 0      | 66   | 0.25    | 1       | U | R.LNGDANTPDAVWR.S + Deamidated (NQ)               |
| <a href="#">172</a> | 288   | -   | 300      | 715.8567  | 1429.6989 | 1429.6474 | 36.0    | 0      | 58   | 1.4     | 1       | U | R.LNGDANTPDAVWR.S + 2 Deamidated (NQ)             |
| <a href="#">120</a> | 306   | -   | 317      | 659.8295  | 1317.6444 | 1317.6161 | 21.5    | 0      | 76   | 0.023   | 1       |   | K.TVEINNTDAEGR.L                                  |
| <a href="#">124</a> | 318   | -   | 329      | 666.9009  | 1331.7872 | 1331.7812 | 4.44    | 0      | 75   | 0.019   | 1       |   | R.LILADAITYAIR.Q                                  |
| <a href="#">125</a> | 318   | -   | 329      | 666.9009  | 1331.7872 | 1331.7812 | 4.44    | 0      | 97   | 0.00013 | 1       |   | R.LILADAITYAIR.Q                                  |
| <a href="#">227</a> | 333   | -   | 347      | 758.4447  | 1514.8749 | 1514.8668 | 5.39    | 0      | 111  | 5.8e-06 | 1       | U | K.ASEIISIATLTGAIR.I                               |
| <a href="#">229</a> | 333   | -   | 347      | 758.4500  | 1514.8854 | 1514.8668 | 12.3    | 0      | 123  | 3.5e-07 | 1       | U | K.ASEIISIATLTGAIR.I                               |
| <a href="#">230</a> | 333   | -   | 347      | 758.4526  | 1514.8906 | 1514.8668 | 15.7    | 0      | 70   | 0.061   | 1       | U | K.ASEIISIATLTGAIR.I                               |
| <a href="#">231</a> | 333   | -   | 347      | 758.4526  | 1514.8906 | 1514.8668 | 15.7    | 0      | 74   | 0.028   | 1       | U | K.ASEIISIATLTGAIR.I                               |
| <a href="#">232</a> | 333   | -   | 347      | 758.4526  | 1514.8906 | 1514.8668 | 15.7    | 0      | 90   | 0.00068 | 1       | U | K.ASEIISIATLTGAIR.I                               |
| <a href="#">286</a> | 348   | -   | 363      | 849.4246  | 1696.8347 | 1696.8308 | 2.28    | 0      | 95   | 0.00035 | 1       | U | R.IALGETFTGAFANEEK.I                              |
| <a href="#">287</a> | 348   | -   | 363      | 849.4274  | 1696.8402 | 1696.8308 | 5.54    | 0      | 100  | 9.6e-05 | 1       | U | R.IALGETFTGAFANEEK.I                              |
| <a href="#">288</a> | 348   | -   | 363      | 849.4329  | 1696.8512 | 1696.8308 | 12.0    | 0      | 78   | 0.015   | 1       | U | R.IALGETFTGAFANEEK.I                              |
| <a href="#">289</a> | 348   | -   | 363      | 849.4356  | 1696.8567 | 1696.8308 | 15.3    | 0      | 89   | 0.0014  | 1       | U | R.IALGETFTGAFANEEK.I                              |
| <a href="#">40</a>  | 374   | -   | 381      | 487.2654  | 972.5162  | 972.5029  | 13.7    | 0      | 55   | 2.2     | 4       |   | K.EAGELIWR.M                                      |
| <a href="#">193</a> | 382   | -   | 393      | 735.3760  | 1468.7375 | 1468.7245 | 8.84    | 0      | 67   | 0.17    | 1       | U | R.MPLHQDFAQNIR.D                                  |
| <a href="#">194</a> | 382   | -   | 393      | 735.3786  | 1468.7426 | 1468.7245 | 12.3    | 0      | 27   | 2e+03   | 8       | U | R.MPLHQDFAQNIR.D                                  |
| <a href="#">209</a> | 382   | -   | 393      | 743.3744  | 1484.7343 | 1484.7194 | 10.0    | 0      | 51   | 6.6     | 1       | U | R.MPLHQDFAQNIR.D + Oxidation (M)                  |
| <a href="#">210</a> | 382   | -   | 393      | 743.3770  | 1484.7395 | 1484.7194 | 13.5    | 0      | 74   | 0.037   | 1       | U | R.MPLHQDFAQNIR.D + Oxidation (M)                  |
| <a href="#">211</a> | 382   | -   | 393      | 743.3822  | 1484.7498 | 1484.7194 | 20.5    | 0      | 35   | 2.7e+02 | 3       | U | R.MPLHQDFAQNIR.D + Oxidation (M)                  |
| <a href="#">213</a> | 382   | -   | 393      | 743.8727  | 1485.7309 | 1485.7034 | 18.5    | 0      | 27   | 2e+03   | 1       | U | R.MPLHQDFAQNIR.D + Deamidated (NQ); Oxidation (M) |
| <a href="#">260</a> | 382   | -   | 394      | 792.8945  | 1583.7745 | 1583.7514 | 14.6    | 1      | 44   | 37      | 1       | U | R.MPLHQDFAQNIRD.S                                 |

| Query               | Start | End | Observed | Mr(expt)  | Mr(calc)  | ppm       | M Score | Expect | Rank | U       | Peptide |   |                                         |              |
|---------------------|-------|-----|----------|-----------|-----------|-----------|---------|--------|------|---------|---------|---|-----------------------------------------|--------------|
| <a href="#">298</a> | 409   | -   | 425      | 880.4213  | 1758.8281 | 1758.8134 | 8.35    | 0      | 102  | 6.8e-05 | 1       | U | K.AGSSSAAMFLAEFVEDK.P                   |              |
| <a href="#">332</a> | 409   | -   | 427      | 1002.5030 | 2002.9915 | 2002.9346 | 28.4    | 0      | 118  | 2e-06   | 1       | U | K.AGSSSAAMFLAEFVEDKPF.I                 |              |
| <a href="#">334</a> | 409   | -   | 427      | 1010.4805 | 2018.9464 | 2018.9295 | 8.38    | 0      | 96   | 0.00032 | 1       | U | K.AGSSSAAMFLAEFVEDKPF.I + Oxidation (M) |              |
| <a href="#">389</a> | 418   | -   | 439      | 825.4498  | 2473.3276 | 2473.3257 | 0.77    | 0      | 72   | 0.077   | 1       | U | F.LAEFVEDKPFHLDIAATAFVK.N               |              |
| <a href="#">43</a>  | 440   | -   | 448      | 487.7671  | 973.5196  | 973.5015  | 18.6    | 0      | 27   | 1.7e+03 | 1       | U | K.NTPGVMVR.S                            |              |
| <a href="#">62</a>  | 449   | -   | 457      | 518.3130  | 1034.6115 | 1034.6012 | 10.0    | 0      | 48   |         | 6       | 1 | U                                       | R.SLVEYLAK.Q |

## Band 8 37kDa

[2::Q4A9M4](#) Mass: 51376 Score: 1928 Matches: 46(17) Sequences: 27(10) emPAI: 2.90 tr|Q4A9M4|pepA Leucyl aminopeptidase Tax\_Id=262719 [Mycoplasma hyopneumoniae (strain J / ATCC 25934 / NCTC 10110)]

### Protein sequence coverage: 64%

|     |            |            |            |             |            |
|-----|------------|------------|------------|-------------|------------|
| 1   | MKNFSEIFIK | YSNKFESNRI | TIEPAYSDSQ | IPMLIKEDLA  | ITEYLGQKKA |
| 51  | YINLGSRSKE | LTPNRFKRIA | AKLGHYPRDM | QINFDFKFPNS | FLRYLIEVIA |
| 101 | FQRSDFSLR  | ADYAKNRAKN | RDILVVSSYL | DELKPIIDKY  | QIINNSVNYA |
| 151 | RYYQNMPPNM | ASSEFLASEI | QKKMNLNPKL | TVKVLGENEV  | RKLGMNLLLA |
| 201 | VNRGSTYDAK | LVVISYEGLP | GSQYKTAFIG | KGITFDSGGY  | NIKTGMYMND |
| 251 | MKIDMSGAIL | CAAIDALSQ  | FNPLANVVAV | LPLTDNRLNG  | DANTPDAVWR |
| 301 | SMNGKTVEIN | NTDAEGRIL  | ADAITAIRQ  | EKASEIISIA  | TLTGAIKIAL |
| 351 | GETFTGAFAN | EKIWKNFNE  | ASKEAGELIW | RMPLHQDFAQ  | NIRDSKVADL |
| 401 | KNTDFSGKAG | SSSAAMFLAE | FVEDKPFHIL | DIAATAFVKN  | TPTGVMVRS  |
| 451 | VEYLAKQN   |            |            |             |            |

| Query               | Start | End | Observed | Mr(expt)  | Mr(calc)  | ppm       | M Score | Expect | Rank | U       | Peptide |   |                                       |
|---------------------|-------|-----|----------|-----------|-----------|-----------|---------|--------|------|---------|---------|---|---------------------------------------|
| <a href="#">87</a>  | 3     | -   | 10       | 499.2799  | 996.5453  | 996.5280  | 17.4    | 0      | 42   | 34      | 3       | U | K.NFSEIFIK.Y                          |
| <a href="#">238</a> | 20    | -   | 33       | 782.8893  | 1563.7640 | 1563.7490 | 9.57    | 0      | 32   | 6.5e+02 | 10      | U | R.ITIEPAYSDSQIPM.L                    |
| <a href="#">244</a> | 20    | -   | 33       | 790.8857  | 1579.7569 | 1579.7440 | 8.22    | 0      | 45   | 27      | 1       | U | R.ITIEPAYSDSQIPM.L + Oxidation (M)    |
| <a href="#">280</a> | 20    | -   | 36       | 960.0221  | 1918.0296 | 1918.0121 | 9.14    | 0      | 67   | 0.21    | 1       | U | R.ITIEPAYSDSQIPMLIK.E                 |
| <a href="#">283</a> | 20    | -   | 36       | 968.0234  | 1934.0323 | 1934.0070 | 13.1    | 0      | 59   | 1.4     | 1       | U | R.ITIEPAYSDSQIPMLIK.E + Oxidation (M) |
| <a href="#">177</a> | 37    | -   | 48       | 690.3621  | 1378.7096 | 1378.6980 | 8.43    | 0      | 66   | 0.22    | 1       | U | K.EDLAITEYLGQK.K                      |
| <a href="#">67</a>  | 50    | -   | 57       | 447.2512  | 892.4879  | 892.4766  | 12.6    | 0      | 30   | 4.9e+02 | 4       | U | K.AYINLGSRS.S                         |
| <a href="#">178</a> | 79    | -   | 89       | 692.8269  | 1383.6393 | 1383.6129 | 19.1    | 1      | 54   | 2.7     | 1       | U | R.DMQINFDFKFPN.S + Oxidation (M)      |
| <a href="#">278</a> | 79    | -   | 93       | 936.4693  | 1870.9241 | 1870.9036 | 11.0    | 1      | 107  | 2.2e-05 | 1       | U | R.DMQINFDFKFPNSFLR.Y                  |
| <a href="#">279</a> | 79    | -   | 93       | 944.4681  | 1886.9217 | 1886.8985 | 12.3    | 1      | 96   | 0.00029 | 1       | U | R.DMQINFDFKFPNSFLR.Y + Oxidation (M)  |
| <a href="#">63</a>  | 87    | -   | 93       | 440.7419  | 879.4693  | 879.4603  | 10.2    | 0      | 45   | 18      | 2       | U | K.FPNSFLR.Y                           |
| <a href="#">153</a> | 94    | -   | 103      | 626.3688  | 1250.7230 | 1250.7023 | 16.5    | 0      | 69   | 0.065   | 1       | U | R.YLIEVIAFQR.S                        |
| <a href="#">40</a>  | 104   | -   | 110      | 419.2330  | 836.4515  | 836.4392  | 14.7    | 0      | 50   | 5       | 1       | U | R.SDFSLR.A                            |
| <a href="#">290</a> | 122   | -   | 139      | 1030.5898 | 2059.1651 | 2059.1452 | 9.64    | 0      | 67   | 0.18    | 1       | U | R.DILVVSSYLDELKPIIDK.Y                |
| <a href="#">291</a> | 122   | -   | 139      | 1030.5898 | 2059.1651 | 2059.1452 | 9.64    | 0      | 72   | 0.055   | 1       | U | R.DILVVSSYLDELKPIIDK.Y                |
| <a href="#">292</a> | 122   | -   | 139      | 1030.5959 | 2059.1772 | 2059.1452 | 15.5    | 0      | 85   | 0.0029  | 1       | U | R.DILVVSSYLDELKPIIDK.Y                |
| <a href="#">196</a> | 140   | -   | 151      | 727.8703  | 1453.7261 | 1453.7313 | -3.60   | 0      | 55   | 2.5     | 1       | U | K.YQIINNSVNYAR.Y                      |
| <a href="#">197</a> | 140   | -   | 151      | 727.8805  | 1453.7465 | 1453.7313 | 10.5    | 0      | 72   | 0.057   | 1       | U | K.YQIINNSVNYAR.Y                      |
| <a href="#">198</a> | 140   | -   | 151      | 728.3685  | 1454.7224 | 1454.7153 | 4.87    | 0      | 49   | 12      | 5       | U | K.YQIINNSVNYAR.Y + Deamidated (NQ)    |
| <a href="#">199</a> | 140   | -   | 151      | 728.3710  | 1454.7275 | 1454.7153 | 8.38    | 0      | 109  | 1.2e-05 | 1       | U | K.YQIINNSVNYAR.Y + Deamidated (NQ)    |
| <a href="#">200</a> | 140   | -   | 151      | 728.3762  | 1454.7378 | 1454.7153 | 15.4    | 0      | 55   | 2.6     | 1       | U | K.YQIINNSVNYAR.Y + Deamidated (NQ)    |

| Query               | Start | End | Observed  | Mr(expt)  | Mr(calc)  | ppm   | M | Score | Expect  | Rank | U | Peptide                                     |
|---------------------|-------|-----|-----------|-----------|-----------|-------|---|-------|---------|------|---|---------------------------------------------|
| <a href="#">201</a> | 140   | 151 | 728.3813  | 1454.7480 | 1454.7153 | 22.4  | 0 | 61    | 0.75    | 1    | U | K.YQIINNSVNYAR.Y + Deamidated (NQ)          |
| <a href="#">316</a> | 152   | 172 | 1224.5810 | 2447.1474 | 2447.1137 | 13.8  | 0 | 54    | 5.7     | 1    | U | R.YYQNMPPNMASSEFLASEIQK.K                   |
| <a href="#">319</a> | 152   | 172 | 1240.5785 | 2479.1425 | 2479.1035 | 15.7  | 0 | 61    | 1       | 1    | U | R.YYQNMPPNMASSEFLASEIQK.K + 2 Oxidation (M) |
| <a href="#">171</a> | 192   | 203 | 671.4144  | 1340.8143 | 1340.7962 | 13.5  | 1 | 113   | 2.3e-06 | 1    | U | R.KLGMNLLAVNR.G                             |
| <a href="#">173</a> | 192   | 203 | 679.4109  | 1356.8073 | 1356.7911 | 11.9  | 1 | 94    | 0.00022 | 1    | U | R.KLGMNLLAVNR.G + Oxidation (M)             |
| <a href="#">145</a> | 193   | 203 | 607.3676  | 1212.7206 | 1212.7012 | 16.0  | 0 | 94    | 0.00019 | 1    | U | K.LGMNLLAVNR.G                              |
| <a href="#">147</a> | 193   | 203 | 615.3664  | 1228.7182 | 1228.6962 | 18.0  | 0 | 103   | 3e-05   | 1    | U | K.LGMNLLAVNR.G + Oxidation (M)              |
| <a href="#">255</a> | 211   | 225 | 826.9547  | 1651.8948 | 1651.8821 | 7.69  | 0 | 56    | 2.5     | 1    | U | K.LVVISYEGLPGSQYK.T                         |
| <a href="#">156</a> | 232   | 243 | 636.3218  | 1270.6290 | 1270.6194 | 7.56  | 0 | 58    | 1.3     | 1    |   | K.GITFDSGGYNIK.T                            |
| <a href="#">320</a> | 264   | 287 | 1276.2245 | 2550.4344 | 2550.3806 | 21.1  | 0 | 126   | 3.1e-07 | 1    | U | A.AIDALSQFNPLANVAVVAVLPLTDNR.L              |
| <a href="#">139</a> | 277   | 287 | 598.8626  | 1195.7106 | 1195.6925 | 15.2  | 0 | 64    | 0.14    | 1    | U | N.VVAVLPLTDNR.L                             |
| <a href="#">190</a> | 288   | 300 | 714.8540  | 1427.6934 | 1427.6793 | 9.83  | 0 | 56    | 2.2     | 1    | U | R.LNGDANTPDVAVWR.S                          |
| <a href="#">191</a> | 288   | 300 | 714.8565  | 1427.6984 | 1427.6793 | 13.4  | 0 | 53    | 4.1     | 1    | U | R.LNGDANTPDVAVWR.S                          |
| <a href="#">192</a> | 288   | 300 | 715.3477  | 1428.6807 | 1428.6633 | 12.2  | 0 | 40    | 98      | 1    | U | R.LNGDANTPDVAVWR.S + Deamidated (NQ)        |
| <a href="#">193</a> | 288   | 300 | 715.3477  | 1428.6807 | 1428.6633 | 12.2  | 0 | 99    | 0.00011 | 1    | U | R.LNGDANTPDVAVWR.S + Deamidated (NQ)        |
| <a href="#">170</a> | 318   | 329 | 666.8886  | 1331.7627 | 1331.7812 | -13.9 | 0 | 97    | 0.00016 | 1    |   | R.LILADAITYAIR.Q                            |
| <a href="#">214</a> | 333   | 347 | 758.4500  | 1514.8854 | 1514.8668 | 12.3  | 0 | 74    | 0.026   | 1    | U | K.ASEIISIATLTGAIR.I                         |
| <a href="#">215</a> | 333   | 347 | 758.4500  | 1514.8854 | 1514.8668 | 12.3  | 0 | 96    | 0.00019 | 1    | U | K.ASEIISIATLTGAIR.I                         |
| <a href="#">216</a> | 333   | 347 | 758.4526  | 1514.8906 | 1514.8668 | 15.7  | 0 | 111   | 5.7e-06 | 1    | U | K.ASEIISIATLTGAIR.I                         |
| <a href="#">217</a> | 333   | 347 | 758.4604  | 1514.9062 | 1514.8668 | 26.0  | 0 | 71    | 0.043   | 1    | U | K.ASEIISIATLTGAIR.I                         |
| <a href="#">259</a> | 348   | 363 | 849.4356  | 1696.8567 | 1696.8308 | 15.3  | 0 | 99    | 0.00014 | 1    | U | R.IALGETFTGAFANEK.I                         |
| <a href="#">82</a>  | 374   | 381 | 487.2654  | 972.5162  | 972.5029  | 13.7  | 0 | 56    | 1.9     | 3    |   | K.EAGELIWR.M                                |
| <a href="#">208</a> | 382   | 393 | 743.3899  | 1484.7653 | 1484.7194 | 30.9  | 0 | 66    | 0.21    | 1    | U | R.MPLHQDFAQNIR.D + Oxidation (M)            |
| <a href="#">318</a> | 418   | 439 | 1237.6858 | 2473.3570 | 2473.3257 | 12.7  | 0 | 51    | 9.5     | 1    | U | F.LAEFVEDKPFHLDIAATAFVK.N                   |
| <a href="#">97</a>  | 449   | 457 | 518.3152  | 1034.6158 | 1034.6012 | 14.2  | 0 | 36    | 1.1e+02 | 1    | U | R.SLVEYLAK.Q                                |

## Band 9 27kDa

[2::Q4A9M4](#) Mass: 51376 Score: 1560 Matches: 34(15) Sequences: 23(10) emPAI: 2.05 tr|Q4A9M4|pepA Leucyl aminopeptidase Tax\_Id=262719 [Mycoplasma hyopneumoniae (strain J / ATCC 25934 / NCTC 10110)]

Protein sequence coverage: 55%

|     |             |            |            |            |             |
|-----|-------------|------------|------------|------------|-------------|
| 1   | MKNFSEIFIK  | YSNKFESNRI | TIEPAYSDSQ | IPMLIKEDLA | ITEYLGQKKA  |
| 51  | YINLGSRSKE  | LTPNRFKIA  | AKLGHYPRDM | QINFDKFPNS | FLRYLIEVIA  |
| 101 | FQRSDIFSLR  | ADYAKNRAKN | RDILVVSSYL | DELKPIIDKY | QIINNSVNYA  |
| 151 | RYYQNMPPNM  | ASSEFLASEI | QKKNLNPPL  | TVKVLGENEV | RKLGMNLLLA  |
| 201 | VNRGSTDYDAK | LVVISYEGLP | GSQYKTAFIG | KGITFDSGGY | NIKTGMYMND  |
| 251 | MKIDMSGAIL  | CAAIDALSQ  | FNPLANVAVV | LPLTDNRLNG | DANTPDVAVWR |
| 301 | SMNGKTVEIN  | NTDAEGRLLI | ADAITAIRQ  | EKASEISIA  | TLTGAIIRIAL |
| 351 | GETFTGAFAN  | EKIWKNFNE  | ASKEAGELIW | RMPLHQDFAQ | NIRDSKVADL  |
| 401 | KNTDFSGKAG  | SSAAMFLAE  | FVEDKPFHIL | DIAATAFVKV | TPTGVMVRS   |
| 451 | VEYLAKQN    |            |            |            |             |

| Query               | Start | End | Observed | Mr(expt)  | Mr(calc)  | ppm  | M | Score | Expect  | Rank | U | Peptide                            |
|---------------------|-------|-----|----------|-----------|-----------|------|---|-------|---------|------|---|------------------------------------|
| <a href="#">77</a>  | 3     | 10  | 499.2778 | 996.5411  | 996.5280  | 13.1 | 0 | 39    | 67      | 1    | U | K.NFSEIFIK.Y                       |
| <a href="#">197</a> | 20    | 33  | 782.8893 | 1563.7640 | 1563.7490 | 9.57 | 0 | 42    | 60      | 1    | U | R.ITIEPAYSDSQIPM.L                 |
| <a href="#">202</a> | 20    | 33  | 790.8831 | 1579.7516 | 1579.7440 | 4.85 | 0 | 30    | 8.4e+02 | 7    | U | R.ITIEPAYSDSQIPM.L + Oxidation (M) |

| Query               | Start | End | Observed  | Mr(expt)  | Mr(calc)  | ppm  | M | Score | Expect  | Rank | U | Peptide                                     |
|---------------------|-------|-----|-----------|-----------|-----------|------|---|-------|---------|------|---|---------------------------------------------|
| <a href="#">232</a> | 20    | 36  | 960.0250  | 1918.0355 | 1918.0121 | 12.2 | 0 | 47    | 23      | 1    | U | R.ITIEPAYSDSQIPMLIK.E                       |
| <a href="#">234</a> | 20    | 36  | 968.0293  | 1934.0441 | 1934.0070 | 19.2 | 0 | 53    | 6       | 1    | U | R.ITIEPAYSDSQIPMLIK.E + Oxidation (M)       |
| <a href="#">147</a> | 37    | 48  | 690.3621  | 1378.7096 | 1378.6980 | 8.43 | 0 | 50    | 9.5     | 2    | U | K.EDLAITEYLGQK.K                            |
| <a href="#">52</a>  | 50    | 57  | 447.2532  | 892.4919  | 892.4766  | 17.1 | 0 | 39    | 62      | 1    | U | K.AYINLGSR.S                                |
| <a href="#">145</a> | 79    | 89  | 684.8235  | 1367.6325 | 1367.6180 | 10.6 | 1 | 62    | 0.45    | 1    | U | R.DMQINFDFKFPN.S                            |
| <a href="#">230</a> | 79    | 93  | 944.4681  | 1886.9217 | 1886.8985 | 12.3 | 1 | 94    | 0.00046 | 1    | U | R.DMQINFDFKFPNSFLR.Y + Oxidation (M)        |
| <a href="#">120</a> | 94    | 103 | 626.3688  | 1250.7230 | 1250.7023 | 16.5 | 0 | 89    | 0.00069 | 1    | U | R.YLIEVIAFQR.S                              |
| <a href="#">26</a>  | 104   | 110 | 419.2350  | 836.4554  | 836.4392  | 19.3 | 0 | 51    | 3.6     | 1    | U | R.SDIFSLR.A                                 |
| <a href="#">242</a> | 122   | 139 | 1030.5837 | 2059.1529 | 2059.1452 | 3.73 | 0 | 74    | 0.041   | 1    | U | R.DILVVSSYLDELKPIIDK.Y                      |
| <a href="#">243</a> | 122   | 139 | 1030.5959 | 2059.1772 | 2059.1452 | 15.5 | 0 | 85    | 0.0027  | 1    | U | R.DILVVSSYLDELKPIIDK.Y                      |
| <a href="#">244</a> | 122   | 139 | 1030.5989 | 2059.1833 | 2059.1452 | 18.5 | 0 | 74    | 0.036   | 1    | U | R.DILVVSSYLDELKPIIDK.Y                      |
| <a href="#">245</a> | 122   | 139 | 1030.6020 | 2059.1894 | 2059.1452 | 21.4 | 0 | 61    | 0.63    | 1    | U | R.DILVVSSYLDELKPIIDK.Y                      |
| <a href="#">164</a> | 140   | 151 | 727.8780  | 1453.7414 | 1453.7313 | 6.94 | 0 | 74    | 0.038   | 1    | U | K.YQIINNSVNYAR.Y                            |
| <a href="#">165</a> | 140   | 151 | 727.8857  | 1453.7568 | 1453.7313 | 17.5 | 0 | 86    | 0.0021  | 1    | U | K.YQIINNSVNYAR.Y                            |
| <a href="#">166</a> | 140   | 151 | 728.3685  | 1454.7224 | 1454.7153 | 4.87 | 0 | 55    | 2.7     | 1    | U | K.YQIINNSVNYAR.Y + Deamidated (NQ)          |
| <a href="#">167</a> | 140   | 151 | 728.3736  | 1454.7326 | 1454.7153 | 11.9 | 0 | 54    | 3.3     | 1    | U | K.YQIINNSVNYAR.Y + Deamidated (NQ)          |
| <a href="#">168</a> | 140   | 151 | 728.3787  | 1454.7429 | 1454.7153 | 18.9 | 0 | 73    | 0.044   | 1    | U | K.YQIINNSVNYAR.Y + Deamidated (NQ)          |
| <a href="#">268</a> | 152   | 172 | 1224.5777 | 2447.1408 | 2447.1137 | 11.1 | 0 | 59    | 1.6     | 1    | U | R.YYQNMPPNMASSEFLASEIQK.K                   |
| <a href="#">269</a> | 152   | 172 | 1240.5852 | 2479.1559 | 2479.1035 | 21.1 | 0 | 72    | 0.087   | 1    | U | R.YYQNMPPNMASSEFLASEIQK.K + 2 Oxidation (M) |
| <a href="#">140</a> | 192   | 203 | 671.4169  | 1340.8192 | 1340.7962 | 17.2 | 1 | 113   | 2.2e-06 | 1    | U | R.KLGMNLLLAVNR.G                            |
| <a href="#">143</a> | 192   | 203 | 679.4134  | 1356.8122 | 1356.7911 | 15.5 | 1 | 95    | 0.00019 | 1    | U | R.KLGMNLLLAVNR.G + Oxidation (M)            |
| <a href="#">118</a> | 193   | 203 | 615.3664  | 1228.7182 | 1228.6962 | 18.0 | 0 | 66    | 0.15    | 1    | U | K.LGMNLLLAVNR.G + Oxidation (M)             |
| <a href="#">207</a> | 211   | 225 | 826.9601  | 1651.9057 | 1651.8821 | 14.3 | 0 | 47    | 18      | 1    | U | K.LVVISYEGPLGSGYK.T                         |
| <a href="#">124</a> | 232   | 243 | 636.3242  | 1270.6337 | 1270.6194 | 11.3 | 0 | 49    | 11      | 1    |   | K.GITFDSGGYNIK.T                            |
| <a href="#">114</a> | 277   | 287 | 598.8626  | 1195.7106 | 1195.6925 | 15.2 | 0 | 74    | 0.015   | 1    | U | N.VVAVLPLTDNR.L                             |
| <a href="#">160</a> | 288   | 300 | 715.3527  | 1428.6909 | 1428.6633 | 19.3 | 0 | 77    | 0.02    | 1    | U | R.LNGDANTPDAVWR.S + Deamidated (NQ)         |
| <a href="#">139</a> | 318   | 329 | 666.9082  | 1331.8018 | 1331.7812 | 15.5 | 0 | 89    | 0.00057 | 1    |   | R.LILADAITYAIR.Q                            |
| <a href="#">182</a> | 333   | 347 | 758.4500  | 1514.8854 | 1514.8668 | 12.3 | 0 | 126   | 1.9e-07 | 1    | U | K.ASEIISIATLTGAIR.I                         |
| <a href="#">210</a> | 348   | 363 | 849.4329  | 1696.8512 | 1696.8308 | 12.0 | 0 | 92    | 0.00063 | 1    | U | R.IALGETFTGAFANEEK.I                        |
| <a href="#">170</a> | 382   | 393 | 735.3812  | 1468.7478 | 1468.7245 | 15.8 | 0 | 51    | 6.8     | 2    | U | R.MPLHQDFAQNIR.D                            |
| <a href="#">88</a>  | 449   | 457 | 518.3195  | 1034.6245 | 1034.6012 | 22.5 | 0 | 45    | 12      | 1    | U | R.SLVEYILAK.Q                               |

## Band 10 25kDa

[2::Q4A9M4](#) Mass: 51376 Score: 587 Matches: 9(3) Sequences: 9(3) tr|Q4A9M4|pepA Leucyl aminopeptidase Tax\_Id=262719 [Mycoplasma hyopneumoniae (strain J / ATCC 25934 / NCTC 10110)]

## Protein sequence coverage: 27%

|     |            |            |            |             |            |
|-----|------------|------------|------------|-------------|------------|
| 1   | MKNFSEIFIK | YSNKFESNRI | TIEPAYSDSQ | IPMLIKEDLA  | ITEYLGQKKA |
| 51  | YINLGSRSKE | LTPNRFKIA  | AKLGHYPRDM | QINFDFKFPNS | FLRYLIEVIA |
| 101 | FQRSDIFSLR | ADYAKNRAKN | RDILVVSSYL | DELKPIIDKY  | QIINNSVNYA |
| 151 | RYYQNMPPNM | ASSEFLASEI | QKKMNLNPKL | TVKVLGENEV  | RKLGMNLLLA |
| 201 | VNRGSTYDAK | LVVISYEGLP | GSQYKTAFIG | KGITFDSGGY  | NIKTGMYMND |
| 251 | MKIDMSGAIL | CAAIDALSQ  | FNPLANVVAV | LPLTDNRLNG  | DANTPDAVWR |
| 301 | SMNGKTVEIN | NTDAEGRIL  | ADAITYAIRQ | EKASEIISIA  | TLTGAIIRAL |
| 351 | GETFTGAFAN | EEKIWKFNFE | ASKEAGELIW | RMPLHQDFAQ  | NIRDSKVADL |
| 401 | KNTDFSGKAG | SSSAAMFLAE | FVEDKPFHIL | DIAATAFVKN  | TPTGVMVRSL |

451 VEYLAKQN

| Query              | Start | End | Observed | Mr(expt)  | Mr(calc)  | ppm  | M | Score | Expect  | Rank | U | Peptide                               |
|--------------------|-------|-----|----------|-----------|-----------|------|---|-------|---------|------|---|---------------------------------------|
| <a href="#">37</a> | 20    | 36  | 968.0293 | 1934.0441 | 1934.0070 | 19.2 | 0 | 68    | 0.16    | 1    | U | R.ITIEPAYSDSQIPMLIK.E + Oxidation (M) |
| <a href="#">26</a> | 37    | 48  | 690.3745 | 1378.7345 | 1378.6980 | 26.5 | 0 | 54    | 3.6     | 2    | U | K.EDLAITEYLGQK.K                      |
| <a href="#">24</a> | 94    | 103 | 626.3711 | 1250.7277 | 1250.7023 | 20.3 | 0 | 64    | 0.23    | 2    | U | R.YLIEVIAFQR.S                        |
| <a href="#">40</a> | 122   | 139 | 687.4001 | 2059.1785 | 2059.1452 | 16.1 | 0 | 56    | 2.1     | 1    | U | R.DILVVSSYLDELKPIIDK.Y                |
| <a href="#">22</a> | 193   | 203 | 607.3652 | 1212.7159 | 1212.7012 | 12.1 | 0 | 71    | 0.041   | 1    | U | K.LGMNLLAVNR.G                        |
| <a href="#">35</a> | 211   | 225 | 826.9629 | 1651.9111 | 1651.8821 | 17.6 | 0 | 25    | 2.8e+03 | 2    | U | K.LVVISYEGLPGSQYK.T                   |
| <a href="#">25</a> | 318   | 329 | 666.9131 | 1331.8116 | 1331.7812 | 22.8 | 0 | 63    | 0.21    | 1    | U | R.LILADAITYAIR.Q                      |
| <a href="#">28</a> | 333   | 347 | 758.4526 | 1514.8906 | 1514.8668 | 15.7 | 0 | 112   | 4e-06   | 1    | U | K.ASEIISIATLTGAIR.I                   |
| <a href="#">36</a> | 348   | 363 | 849.4412 | 1696.8678 | 1696.8308 | 21.8 | 0 | 88    | 0.0015  | 1    | U | R.IALGETFTGAFANEK.I                   |

## Band 11 20kDa

### Protein sequence coverage: 17%

|     |            |            |               |            |             |
|-----|------------|------------|---------------|------------|-------------|
| 1   | MKNFSEIFIK | YSNKFESNRI | TIEPAYSDSQ    | IPMLIKEDLA | ITEYLGQKKA  |
| 51  | YINLGSRSKE | LTPNRFKIA  | AKLGHYPRDM    | QINFDFPNS  | FLRYLIEVIA  |
| 101 | FQRSDIFSLR | ADYAKNRAKN | RDILVVSSYL    | DELKPIIDKY | QIINNSVNYA  |
| 151 | RYYQNMPPNM | ASSEFLASEI | QKKMNLNPKL    | TVKVLGENEV | RKLGMNLLLA  |
| 201 | VNRGSTYDAK | LVVISYEGLP | GSQYKTAFIG    | KGITFDSGGY | NIKTGMYMND  |
| 251 | MKIDMSGAIL | CAAIDALSQ  | FNPLANVVAV    | LPLTDNRLNG | DANTPDAVWR  |
| 301 | SMNGKTVEIN | NTDAEGR    | LILADAITYAIRQ | EKASEIISIA | TLTGAIIRIAL |
| 351 | GETFTGAFAN | EEKIWKNFNE | ASKEAGELIW    | RMPLHQDFAQ | NIRDSKVADL  |
| 401 | KNTDFSGKAG | SSSAAMFLAE | FVEDKPFHIL    | DIAATAFVKN | TPTGVMVRSL  |
| 451 | VEYLAKQN   |            |               |            |             |

| Query              | Start | End | Observed  | Mr(expt)  | Mr(calc)  | ppm  | M | Score | Expect  | Rank | U | Peptide                |
|--------------------|-------|-----|-----------|-----------|-----------|------|---|-------|---------|------|---|------------------------|
| <a href="#">7</a>  | 94    | 103 | 626.3759  | 1250.7372 | 1250.7023 | 27.9 | 0 | 62    | 0.32    | 1    | U | R.YLIEVIAFQR.S         |
| <a href="#">14</a> | 122   | 139 | 1030.6111 | 2059.2076 | 2059.1452 | 30.3 | 0 | 39    | 96      | 8    | U | R.DILVVSSYLDELKPIIDK.Y |
| <a href="#">8</a>  | 318   | 329 | 666.9131  | 1331.8116 | 1331.7812 | 22.8 | 0 | 56    | 1.1     | 1    | U | R.LILADAITYAIR.Q       |
| <a href="#">10</a> | 333   | 347 | 758.4578  | 1514.9010 | 1514.8668 | 22.6 | 0 | 99    | 8.1e-05 | 1    | U | K.ASEIISIATLTGAIR.I    |
| <a href="#">12</a> | 348   | 363 | 849.4412  | 1696.8678 | 1696.8308 | 21.8 | 0 | 64    | 0.39    | 1    | U | R.IALGETFTGAFANEK.I    |
| <a href="#">5</a>  | 449   | 457 | 518.3195  | 1034.6245 | 1034.6012 | 22.5 | 0 | 27    | 7.5e+02 | 1    | U | R.SLVEYLAK.Q           |
