# Supplementary material for: MHJ_0461 is a multifunctional leucine aminopeptidase on the surface of Mycoplasma hyopneumoniae
Source: PubMed Central journal article supplement (PMC4313372; doi:10.1098/rsob.140175), 2015-01-14

Ligand blot of rMHJ 0461 probed with plasminogen in the presence of a lysine analog shows no binding

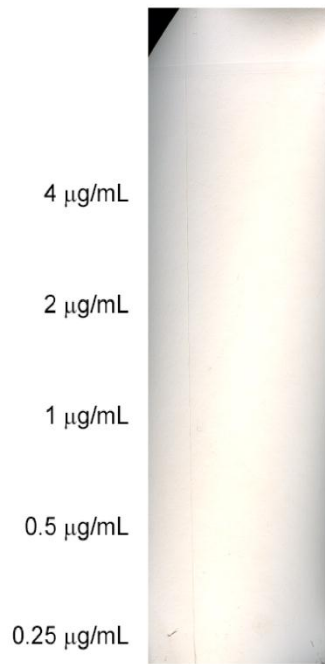

Supplement: rsob140175supp3.pdf [file rsob140175supp3.pdf]
